# Supplementary material for: Efficacy of first-line treatments for multiple myeloma patients not eligible for stem cell transplantation: a network meta-analysis
Source: PubMed Central journal article supplement — Haematologica. 2019 Jan 3;104(5):1026–35. doi: 10.3324/haematol.2018.206912 (PMC6518894; doi:10.3324/haematol.2018.206912), 2019-05

## Efficacy of first-line treatments for multiple myeloma patients not eligible for stem cell transplantation: a network meta-analysis

Hedwig M. Blommestein,<sup>1,2\*</sup> Chrissy H.Y. van Beurden-Tan,<sup>3\*</sup> Margreet G. Franken,<sup>1</sup> Carin A. Uyl-de Groot,<sup>1,2</sup> Pieter Sonneveld<sup>3</sup> and Sonja Zweegman<sup>4</sup>

*\*HB and CvBT contributed equally to this work*

<sup>1</sup>Erasmus School of Health Policy & Management, Institute for Medical Technology Assessment, Erasmus University Rotterdam;

<sup>2</sup>Comprehensive Cancer Organisation, Utrecht; <sup>3</sup>Erasmus MC Cancer Institute, Rotterdam and <sup>4</sup>Department of Hematology, Amsterdam UMC, the Netherlands

©2019 Ferrata Storti Foundation. This is an open-access paper. doi:10.3324/haematol.2018.206912

Received: September 14, 2018.

Accepted: January 2, 2019.

Pre-published: January 3, 2019.

Correspondence: HEDWIG M. BLOMMESTEIN [blommestein@eshpm.eur.nl](mailto:blommestein@eshpm.eur.nl)

---

## Appendix 1 Search strategies

### 1.1 Embase® and MEDLINE®

|                  |                                                           |
|------------------|-----------------------------------------------------------|
| Database name    | Embase®/MEDLINE®                                          |
| Search interface | <a href="http://www.embase.com">http://www.embase.com</a> |
| Date of search   | 5 March 2016                                              |
| Time segment     | 16 June 2010 to 01 March 2016                             |
| Search filter    | -                                                         |

**Table Embase® and MEDLINE® search strategy for randomized controlled trials**

| #  | Search term                                                                                                                        |
|----|------------------------------------------------------------------------------------------------------------------------------------|
| 1  | 'clinical trial'/exp                                                                                                               |
| 2  | 'randomization'/de                                                                                                                 |
| 3  | 'controlled study'/de                                                                                                              |
| 4  | 'comparative study'/de                                                                                                             |
| 5  | 'single blind procedure'/de                                                                                                        |
| 6  | 'double blind procedure'/de                                                                                                        |
| 7  | 'crossover procedure'/de                                                                                                           |
| 8  | 'placebo'/de                                                                                                                       |
| 9  | 'clinical trial' OR 'clinical trials'                                                                                              |
| 10 | 'controlled clinical trial' OR 'controlled clinical trials'                                                                        |
| 11 | 'randomised controlled trial' OR 'randomized controlled trial' OR 'randomised controlled trials' OR 'randomized controlled trials' |
| 12 | 'randomisation' OR 'randomization'                                                                                                 |
| 13 | rct                                                                                                                                |
| 14 | 'random allocation'                                                                                                                |
| 15 | 'randomly allocated'                                                                                                               |
| 16 | 'allocated randomly'                                                                                                               |
| 17 | allocated NEAR/2 random                                                                                                            |
| 18 | (single OR double OR triple OR treble) NEAR/1 (blind* OR mask*)                                                                    |
| 19 | placebo*                                                                                                                           |
| 20 | 'prospective study'/de                                                                                                             |
| 21 | #1 OR #2 OR #3 OR #4 OR #5 OR #6 OR #7 OR #8 OR #9 OR #10 OR #11 OR #12 OR #13 OR #14 OR #15 OR #16 OR #17 OR #18 OR #19 OR #20    |
| 22 | 'case study'/de                                                                                                                    |
| 23 | 'case report'/de                                                                                                                   |
| 24 | 'abstract report'/de                                                                                                               |
| 25 | 'letter'/de                                                                                                                        |

| #  | Search term                                                                                                                                                                                                                                                                                                                                                                                      |
|----|--------------------------------------------------------------------------------------------------------------------------------------------------------------------------------------------------------------------------------------------------------------------------------------------------------------------------------------------------------------------------------------------------|
| 26 | #22 OR #23 OR #24 OR #25                                                                                                                                                                                                                                                                                                                                                                         |
| 27 | #21 NOT #26                                                                                                                                                                                                                                                                                                                                                                                      |
| 28 | 'cohort analysis'/exp                                                                                                                                                                                                                                                                                                                                                                            |
| 29 | 'longitudinal study'/exp                                                                                                                                                                                                                                                                                                                                                                         |
| 30 | 'prospective study'/exp                                                                                                                                                                                                                                                                                                                                                                          |
| 31 | 'follow up'/exp                                                                                                                                                                                                                                                                                                                                                                                  |
| 32 | 'major clinical study'/exp                                                                                                                                                                                                                                                                                                                                                                       |
| 33 | 'clinical trial'/exp                                                                                                                                                                                                                                                                                                                                                                             |
| 34 | 'clinical article'/exp                                                                                                                                                                                                                                                                                                                                                                           |
| 35 | 'intervention study'/exp                                                                                                                                                                                                                                                                                                                                                                         |
| 36 | 'survival'/exp                                                                                                                                                                                                                                                                                                                                                                                   |
| 37 | cohort*:ab,ti                                                                                                                                                                                                                                                                                                                                                                                    |
| 38 | (('follow up' OR followup) NEXT/1 (study OR studies)):ab,ti                                                                                                                                                                                                                                                                                                                                      |
| 39 | (clinical NEXT/1 trial*):ab,ti                                                                                                                                                                                                                                                                                                                                                                   |
| 40 | 'retrospective study'/exp                                                                                                                                                                                                                                                                                                                                                                        |
| 41 | 'case control study'/exp                                                                                                                                                                                                                                                                                                                                                                         |
| 42 | (case* NEXT/1 control*):ab,ti                                                                                                                                                                                                                                                                                                                                                                    |
| 43 | #28 OR #29 OR #30 OR #31 OR #32 OR #33 OR #34 OR #35 OR #36 OR #37 OR #38 OR #39 OR #40 OR #41 OR #42                                                                                                                                                                                                                                                                                            |
| 44 | #27 OR #43                                                                                                                                                                                                                                                                                                                                                                                       |
| 45 | 'multiple myeloma'/de                                                                                                                                                                                                                                                                                                                                                                            |
| 46 | 'myeloma'/de                                                                                                                                                                                                                                                                                                                                                                                     |
| 47 | 'myeloma cell'/de                                                                                                                                                                                                                                                                                                                                                                                |
| 48 | myelom*                                                                                                                                                                                                                                                                                                                                                                                          |
| 49 | #45 OR #46 OR #47 OR #48                                                                                                                                                                                                                                                                                                                                                                         |
| 50 | 'bortezomib'/de                                                                                                                                                                                                                                                                                                                                                                                  |
| 51 | bortezomib:ab,ti OR velcade:ab,ti OR ps341:ab,ti OR 'ps-341':ab,ti OR (ps NEAR/1 '341'):ab,ti OR (proteasome NEXT/1 inhibit*):ab,ti                                                                                                                                                                                                                                                              |
| 52 | 'lenalidomide'/de                                                                                                                                                                                                                                                                                                                                                                                |
| 53 | lenalidomide:ab,ti OR revimid:ab,ti OR revlimid:ab,ti OR 'cc 5013':ab,ti OR cc5013:ab,ti OR 'cdc 501':ab,ti OR 'cdc 5013':ab,ti OR cdc501:ab,ti OR cdc5013:ab,ti OR 'enmd 0997':ab,ti OR enmd0997:ab,ti OR 'imid 3':ab,ti OR imid3:ab,ti                                                                                                                                                         |
| 54 | 'thalidomide'/de                                                                                                                                                                                                                                                                                                                                                                                 |
| 55 | thalidomide:ab,ti OR thalidomid:ab,ti OR thalimodide:ab,ti OR thalomid:ab,ti OR contergan:ab,ti OR distaval:ab,ti OR isomin:ab,ti OR 'k-17':ab,ti OR kedavon:ab,ti OR kevadon:ab,ti OR neurosedin:ab,ti OR neurosedyne:ab,ti OR 'nsc 66847':ab,ti OR sedalis:ab,ti OR 'shin naito':ab,ti OR softenon:ab,ti OR synovir:ab,ti OR talimol:ab,ti OR talizer:ab,ti OR telagan:ab,ti OR telargan:ab,ti |
| 56 | 'bendamustine'/de                                                                                                                                                                                                                                                                                                                                                                                |
| 57 | bendamustine:ab,ti OR 'cimet 3393':ab,ti OR cytotasan:ab,ti OR cytotasane:ab,ti OR 'imet 3393':ab,ti OR ribomustin:ab,ti OR treanda:ab,ti                                                                                                                                                                                                                                                        |

| #  | Search term                                                                                                                                                                                                                                                                                                                                                                                                                                                                                                                                                                                                                                                                                                                                                                                                                                                                                                                                                                                                                                                                                                                                                                                                                                                                                                                                                                                                                                                                                                                                                                                                                                                                                                                                                                                                                                                                                                                                                                                                                                                                                                                                                                                                                                                                                            |
|----|--------------------------------------------------------------------------------------------------------------------------------------------------------------------------------------------------------------------------------------------------------------------------------------------------------------------------------------------------------------------------------------------------------------------------------------------------------------------------------------------------------------------------------------------------------------------------------------------------------------------------------------------------------------------------------------------------------------------------------------------------------------------------------------------------------------------------------------------------------------------------------------------------------------------------------------------------------------------------------------------------------------------------------------------------------------------------------------------------------------------------------------------------------------------------------------------------------------------------------------------------------------------------------------------------------------------------------------------------------------------------------------------------------------------------------------------------------------------------------------------------------------------------------------------------------------------------------------------------------------------------------------------------------------------------------------------------------------------------------------------------------------------------------------------------------------------------------------------------------------------------------------------------------------------------------------------------------------------------------------------------------------------------------------------------------------------------------------------------------------------------------------------------------------------------------------------------------------------------------------------------------------------------------------------------------|
| 58 | 'dexamethasone'/de                                                                                                                                                                                                                                                                                                                                                                                                                                                                                                                                                                                                                                                                                                                                                                                                                                                                                                                                                                                                                                                                                                                                                                                                                                                                                                                                                                                                                                                                                                                                                                                                                                                                                                                                                                                                                                                                                                                                                                                                                                                                                                                                                                                                                                                                                     |
| 59 | 'aeroseb dex':ab,ti OR aflucoson*:ab,ti OR anaflogistico:ab,ti OR arcodexan*:ab,ti OR azium:ab,ti OR calonat:ab,ti OR cebedex:ab,ti OR colofoam:ab,ti OR cortidron*:ab,ti OR cortisumman:ab,ti OR dacortin*:ab,ti OR dalalone:ab,ti OR decacortin:ab,ti OR decadelton*:ab,ti OR decadion:ab,ti OR decadr*n*:ab,ti OR decaesadriil:ab,ti OR decamethasone:ab,ti OR decasone:ab,ti OR decaspray:ab,ti OR decasterolone:ab,ti OR decilone:ab,ti OR decofluor:ab,ti OR dectancyl:ab,ti OR dekaort:ab,ti OR delladec:ab,ti OR deltafluoren:ab,ti OR deltafluorene:ab,ti OR dergramin:ab,ti OR deronil:ab,ti OR desacort:ab,ti OR desacortone:ab,ti OR desadrene:ab,ti OR desalark:ab,ti OR desameton*:ab,ti OR 'dexa cortisyl':ab,ti OR 'dexa dabrosan':ab,ti OR 'dexa korti':ab,ti OR 'dexa scherosan':ab,ti OR 'dexa scherozon':ab,ti OR 'dexa scherozone':ab,ti OR dexachel:ab,ti OR dexacort*:ab,ti OR dexadabrosan:ab,ti OR dexadecadrol:ab,ti OR dexadrol:ab,ti OR dexagen:ab,ti OR dexahelvacort:ab,ti OR dexakorti:ab,ti OR dexalocal:ab,ti OR dexamecortin:ab,ti OR dexameson*:ab,ti OR dexametason*:ab,ti OR dexameth:ab,ti OR dexametha*on*:ab,ti OR dexamethonium:ab,ti OR dexan:ab,ti OR dexane:ab,ti OR dexapot:ab,ti OR dexaschero*on*:ab,ti OR dexason*:ab,ti OR dexinoral:ab,ti OR dexionil:ab,ti OR dexone:ab,ti OR dextelan:ab,ti OR dezone:ab,ti OR doxamethasone:ab,ti OR esacortene:ab,ti OR exadion*:ab,ti OR firmalone:ab,ti OR fluormone:ab,ti OR fluorocort:ab,ti OR fluorodelta:ab,ti OR fortocortin:ab,ti OR gammacorten*:ab,ti OR grosodexon*:ab,ti OR hexadecad*ol:ab,ti OR hexadiol:ab,ti OR hexadrol:ab,ti OR isnacort:ab,ti OR isoptodex:ab,ti OR isoptomaxidex:ab,ti OR 'lokalison f':ab,ti OR luxazone:ab,ti OR marvidione:ab,ti OR maxidex:ab,ti OR mediamethasone:ab,ti OR megacortin:ab,ti OR mephameson*:ab,ti OR metasolon*:ab,ti OR methazonion*:ab,ti OR millicorten:ab,ti OR millicortenol:ab,ti OR 'mk 125':ab,ti OR mk125:ab,ti OR nisomethasone:ab,ti OR novocort:ab,ti OR 'nsc 34521':ab,ti OR nsc34521:ab,ti OR opticorten:ab,ti OR optocortinol:ab,ti OR oradex*n*:ab,ti OR orgadron:ab,ti OR policort:ab,ti OR posurdex:ab,ti OR prodexona:ab,ti OR prodexone:ab,ti OR sanamethasone:ab,ti OR spoloven:ab,ti OR triamcimetil:ab,ti OR visumethazone:ab,ti |
| 60 | 'melphalan'/de                                                                                                                                                                                                                                                                                                                                                                                                                                                                                                                                                                                                                                                                                                                                                                                                                                                                                                                                                                                                                                                                                                                                                                                                                                                                                                                                                                                                                                                                                                                                                                                                                                                                                                                                                                                                                                                                                                                                                                                                                                                                                                                                                                                                                                                                                         |
| 61 | melfh*lan:ab,ti OR alkeran:ab,ti OR 'cb 3025':ab,ti OR cb3025:ab,ti OR 'levo sarcolysin':ab,ti OR levofalan:ab,ti OR melfalan:ab,ti OR melphalon:ab,ti OR 'nsc 8806':ab,ti OR nsc8806:ab,ti OR 'phenylalanine 2037':ab,ti OR 'phenylalanine mustard':ab,ti                                                                                                                                                                                                                                                                                                                                                                                                                                                                                                                                                                                                                                                                                                                                                                                                                                                                                                                                                                                                                                                                                                                                                                                                                                                                                                                                                                                                                                                                                                                                                                                                                                                                                                                                                                                                                                                                                                                                                                                                                                             |
| 62 | 'vincristine'/de                                                                                                                                                                                                                                                                                                                                                                                                                                                                                                                                                                                                                                                                                                                                                                                                                                                                                                                                                                                                                                                                                                                                                                                                                                                                                                                                                                                                                                                                                                                                                                                                                                                                                                                                                                                                                                                                                                                                                                                                                                                                                                                                                                                                                                                                                       |
| 63 | vincristine:ab,ti OR vincristin:ab,ti OR 'I 37231':ab,ti OR I37231:ab,ti OR 'vin cristine':ab,ti OR vincrisul:ab,ti                                                                                                                                                                                                                                                                                                                                                                                                                                                                                                                                                                                                                                                                                                                                                                                                                                                                                                                                                                                                                                                                                                                                                                                                                                                                                                                                                                                                                                                                                                                                                                                                                                                                                                                                                                                                                                                                                                                                                                                                                                                                                                                                                                                    |
| 64 | 'cyclophosphamide'/de                                                                                                                                                                                                                                                                                                                                                                                                                                                                                                                                                                                                                                                                                                                                                                                                                                                                                                                                                                                                                                                                                                                                                                                                                                                                                                                                                                                                                                                                                                                                                                                                                                                                                                                                                                                                                                                                                                                                                                                                                                                                                                                                                                                                                                                                                  |
| 65 | cyclophosphamide:ab,ti OR 'b 518':ab,ti OR b518:ab,ti OR carloxan:ab,ti OR clafen:ab,ti OR cycloblastin*:ab,ti OR 'cyclofos amide':ab,ti OR cyclofosamid*:ab,ti OR cyclophosphamid*:ab,ti OR cyclophosphan*:ab,ti OR cyclostin:ab,ti OR cycloxan:ab,ti OR cyphos:ab,ti OR cytophosphan*:ab,ti OR cytoxan:ab,ti OR 'endocyclo phosphate':ab,ti OR end*xan*:ab,ti OR genoxal:ab,ti OR 'mitoxan neosan':ab,ti OR neosar:ab,ti OR noristan:ab,ti OR 'nsc 26271':ab,ti OR 'nsc 2671':ab,ti OR procytox:ab,ti OR procytooxide:ab,ti OR se*doxan:ab,ti                                                                                                                                                                                                                                                                                                                                                                                                                                                                                                                                                                                                                                                                                                                                                                                                                                                                                                                                                                                                                                                                                                                                                                                                                                                                                                                                                                                                                                                                                                                                                                                                                                                                                                                                                        |
| 66 | 'doxorubicin'/de                                                                                                                                                                                                                                                                                                                                                                                                                                                                                                                                                                                                                                                                                                                                                                                                                                                                                                                                                                                                                                                                                                                                                                                                                                                                                                                                                                                                                                                                                                                                                                                                                                                                                                                                                                                                                                                                                                                                                                                                                                                                                                                                                                                                                                                                                       |
| 67 | doxorubicin:ab,ti OR adriablastin:ab,ti OR adriablastin*:ab,ti AND adriacin:ab,ti OR adriamicin*:ab,ti OR adriblastin*:ab,ti OR caelyx:ab,ti OR doxil:ab,ti OR doxorubicine:ab,ti OR 'fi 106':ab,ti OR fi106:ab,ti OR lipodox:ab,ti OR myocet:ab,ti OR 'nsc 123127':ab,ti OR nsc123127:ab,ti OR rastocin:ab,ti OR resmycin:ab,ti OR 'rp 25253':ab,ti OR rp25253:ab,ti OR rubex:ab,ti OR sarcodoxome:ab,ti OR 'tlc d 99':ab,ti                                                                                                                                                                                                                                                                                                                                                                                                                                                                                                                                                                                                                                                                                                                                                                                                                                                                                                                                                                                                                                                                                                                                                                                                                                                                                                                                                                                                                                                                                                                                                                                                                                                                                                                                                                                                                                                                          |
| 68 | 'carmustine'/de                                                                                                                                                                                                                                                                                                                                                                                                                                                                                                                                                                                                                                                                                                                                                                                                                                                                                                                                                                                                                                                                                                                                                                                                                                                                                                                                                                                                                                                                                                                                                                                                                                                                                                                                                                                                                                                                                                                                                                                                                                                                                                                                                                                                                                                                                        |
| 69 | carmustine:ab,ti OR bcnu:ab,ti OR bicnu:ab,ti OR carmubis:ab,ti OR carmubris:ab,ti OR carmustin:ab,ti OR gliadel:ab,ti OR nitrumon:ab,ti OR 'nsc 409962':ab,ti                                                                                                                                                                                                                                                                                                                                                                                                                                                                                                                                                                                                                                                                                                                                                                                                                                                                                                                                                                                                                                                                                                                                                                                                                                                                                                                                                                                                                                                                                                                                                                                                                                                                                                                                                                                                                                                                                                                                                                                                                                                                                                                                         |
| 70 | 'prednisone'/de                                                                                                                                                                                                                                                                                                                                                                                                                                                                                                                                                                                                                                                                                                                                                                                                                                                                                                                                                                                                                                                                                                                                                                                                                                                                                                                                                                                                                                                                                                                                                                                                                                                                                                                                                                                                                                                                                                                                                                                                                                                                                                                                                                                                                                                                                        |
| 71 | prednisone:ab,ti OR ancortone:ab,ti OR biocortone:ab,ti OR colisone:ab,ti OR cortidelt:ab,ti OR 'de cortisyl':ab,ti OR decortancyl:ab,ti OR de*ortin*:ab,ti OR dehydrocortisone:ab,ti OR delitison:ab,ti OR deltacort*n*:ab,ti OR deltacortisone:ab,ti OR deltasone:ab,ti OR deltra:ab,ti OR 'di-adreson':ab,ti OR diadreson:ab,ti OR en*orton*:ab,ti OR hostacortin:ab,ti OR insone:ab,ti OR meprison:ab,ti OR metacortandracin:ab,ti OR meticorten:ab,ti OR meticortine:ab,ti OR 'nsc 10023':ab,ti OR nsc10023:ab,ti OR orasone*:ab,ti OR paracort:ab,ti OR precort:ab,ti OR precortal:ab,ti OR prednisone*:ab,ti OR pronizone:ab,ti OR rectodelt:ab,ti OR ultracorten:ab,ti OR utilone:ab,ti                                                                                                                                                                                                                                                                                                                                                                                                                                                                                                                                                                                                                                                                                                                                                                                                                                                                                                                                                                                                                                                                                                                                                                                                                                                                                                                                                                                                                                                                                                                                                                                                        |
| 72 | 'prednisolone'/de                                                                                                                                                                                                                                                                                                                                                                                                                                                                                                                                                                                                                                                                                                                                                                                                                                                                                                                                                                                                                                                                                                                                                                                                                                                                                                                                                                                                                                                                                                                                                                                                                                                                                                                                                                                                                                                                                                                                                                                                                                                                                                                                                                                                                                                                                      |
| 73 | prednisolone:ab,ti OR antisolon*:ab,ti OR aprednislon*:ab,ti OR benisolon*:ab,ti OR berisolon*:ab,ti OR caberdelta:ab,ti OR 'co hydeltra':ab,ti OR codelcortone:ab,ti OR cortadelton*:ab,ti OR cortelinter:ab,ti OR cortisolone:ab,ti OR dacortin:ab,ti OR decortril:ab,ti OR dehydrocortex:ab,ti OR dehydrocortisol*:ab,ti OR dehydrohydrocortison*:ab,ti OR delcortol:ab,ti OR deltacortef:ab,ti OR deltacortenolo:ab,ti OR deltacortil:ab,ti OR deltaoortil:ab,ti OR deltaderm:ab,ti OR deltaglycortril:ab,ti OR deltahycortol:ab,ti OR deltahydrocortison*:ab,ti OR deltaohticor:ab,ti OR deltasolone:ab,ti OR deltab:ab,ti OR deltidrosol:ab,ti OR deltilone:ab,ti OR deltilolon*:ab,ti                                                                                                                                                                                                                                                                                                                                                                                                                                                                                                                                                                                                                                                                                                                                                                                                                                                                                                                                                                                                                                                                                                                                                                                                                                                                                                                                                                                                                                                                                                                                                                                                           |

| #  | Search term                                                                                                                                                                                                                                                                                                                                                                                                                                                                                                                                                                                                                                                                                                                                                                                                                                                                                                                                                                                                                                                                                                                                                                                                                                                                                                                                                                                    |
|----|------------------------------------------------------------------------------------------------------------------------------------------------------------------------------------------------------------------------------------------------------------------------------------------------------------------------------------------------------------------------------------------------------------------------------------------------------------------------------------------------------------------------------------------------------------------------------------------------------------------------------------------------------------------------------------------------------------------------------------------------------------------------------------------------------------------------------------------------------------------------------------------------------------------------------------------------------------------------------------------------------------------------------------------------------------------------------------------------------------------------------------------------------------------------------------------------------------------------------------------------------------------------------------------------------------------------------------------------------------------------------------------------|
|    | OR deltalasson*:ab,ti OR deltoson*:ab,ti OR dicortol:ab,ti OR domucortone:ab,ti OR encort*lon*:ab,ti OR glistelone:ab,ti OR hostacortin:ab,ti OR hydeltra:ab,ti OR hydeltrone:ab,ti OR hydrelta:ab,ti OR hydrocortancyl:ab,ti OR hydrocortidelt:ab,ti OR hydrodeltalone:ab,ti OR hydrodeltisone:ab,ti OR hydroretrocortin*:ab,ti OR inflanefran:ab,ti OR insolone:ab,ti OR keteocort:ab,ti OR leocortol:ab,ti OR mediasolone:ab,ti OR meprisolon*:ab,ti OR metacortalon*:ab,ti OR metacortandralon*:ab,ti OR metacortelone:ab,ti OR meticortelone:ab,ti OR metiderm:ab,ti OR morlone:ab,ti OR mydraped:ab,ti OR nisolon:ab,ti OR nisolone:ab,ti OR 'nsc 9120':ab,ti OR nsc9120:ab,ti OR panafcortolone:ab,ti OR panafort:ab,ti OR paracortol:ab,ti OR phlogex:ab,ti OR precortalon:ab,ti OR precortancyl:ab,ti OR precortisyl:ab,ti OR predartrin*:ab,ti OR prednedome:ab,ti OR prednelan:ab,ti OR prednicoelin:ab,ti OR prednicort:ab,ti OR prednicortelone:ab,ti OR prednifor:ab,ti OR predniment:ab,ti OR predniretard:ab,ti OR prednis:ab,ti OR prednivet:ab,ti OR prednorsolon*:ab,ti OR predonine:ab,ti OR predorgasolon*:ab,ti OR prelone:ab,ti OR prenlone:ab,ti OR prezolon:ab,ti OR scherisolone:ab,ti OR serilone:ab,ti OR solone:ab,ti OR solupren*:ab,ti OR spiricort:ab,ti OR spolutane:ab,ti OR sterolone:ab,ti OR supercorti*ol:ab,ti OR taracortelone:ab,ti OR wysolone:ab,ti |
| 74 | 'pomalidomide'/de                                                                                                                                                                                                                                                                                                                                                                                                                                                                                                                                                                                                                                                                                                                                                                                                                                                                                                                                                                                                                                                                                                                                                                                                                                                                                                                                                                              |
| 75 | pomalidomide:ab,ti OR imnovid:ab,ti OR pomalyst:ab,ti OR 'cc-4047':ab,ti OR 'cc 4047':ab,ti OR cc4047:ab,ti                                                                                                                                                                                                                                                                                                                                                                                                                                                                                                                                                                                                                                                                                                                                                                                                                                                                                                                                                                                                                                                                                                                                                                                                                                                                                    |
| 76 | 'panobinostat'/de                                                                                                                                                                                                                                                                                                                                                                                                                                                                                                                                                                                                                                                                                                                                                                                                                                                                                                                                                                                                                                                                                                                                                                                                                                                                                                                                                                              |
| 77 | panobinostat:ab,ti OR farydak:ab,ti OR 'lbh-589':ab,ti OR 'lbh589':ab,ti OR 'lbh 589':ab,ti                                                                                                                                                                                                                                                                                                                                                                                                                                                                                                                                                                                                                                                                                                                                                                                                                                                                                                                                                                                                                                                                                                                                                                                                                                                                                                    |
| 78 | 'carfilzomib'/de                                                                                                                                                                                                                                                                                                                                                                                                                                                                                                                                                                                                                                                                                                                                                                                                                                                                                                                                                                                                                                                                                                                                                                                                                                                                                                                                                                               |
| 79 | carfilzomib:ab,ti OR kyprolis:ab,ti OR 'pr-171':ab,ti OR 'pr171':ab,ti OR 'pr 171':ab,ti                                                                                                                                                                                                                                                                                                                                                                                                                                                                                                                                                                                                                                                                                                                                                                                                                                                                                                                                                                                                                                                                                                                                                                                                                                                                                                       |
| 80 | 'daratumumab'/de                                                                                                                                                                                                                                                                                                                                                                                                                                                                                                                                                                                                                                                                                                                                                                                                                                                                                                                                                                                                                                                                                                                                                                                                                                                                                                                                                                               |
| 81 | daratumumab:ab,ti OR darzalex:ab,ti                                                                                                                                                                                                                                                                                                                                                                                                                                                                                                                                                                                                                                                                                                                                                                                                                                                                                                                                                                                                                                                                                                                                                                                                                                                                                                                                                            |
| 82 | 'ixazomib'/de                                                                                                                                                                                                                                                                                                                                                                                                                                                                                                                                                                                                                                                                                                                                                                                                                                                                                                                                                                                                                                                                                                                                                                                                                                                                                                                                                                                  |
| 83 | ixazomib:ab,ti OR ninlaro:ab,ti OR mln9708:ab,ti OR 'mln 9708':ab,ti OR 'mln-9708':ab,ti                                                                                                                                                                                                                                                                                                                                                                                                                                                                                                                                                                                                                                                                                                                                                                                                                                                                                                                                                                                                                                                                                                                                                                                                                                                                                                       |
| 84 | 'elotuzumab'/de                                                                                                                                                                                                                                                                                                                                                                                                                                                                                                                                                                                                                                                                                                                                                                                                                                                                                                                                                                                                                                                                                                                                                                                                                                                                                                                                                                                |
| 85 | elotuzumab:ab,ti OR empliciti:ab,ti OR HuLuc63:ab,ti OR BMS-901608:ab,ti                                                                                                                                                                                                                                                                                                                                                                                                                                                                                                                                                                                                                                                                                                                                                                                                                                                                                                                                                                                                                                                                                                                                                                                                                                                                                                                       |
| 86 | #50 OR #51 OR #52 OR #53 OR #54 OR #55 OR #56 OR #57 OR #58 OR #59 OR #60 OR #61 OR #62 OR #63 OR #64 OR #65 OR #66 OR #67 OR #68 OR #69 OR #70 OR #71 OR #72 OR #73 OR #74 OR #75 OR #76 OR #77 OR #78 OR #79 OR #80 OR #81 OR #82 OR #83 OR #84 OR #85                                                                                                                                                                                                                                                                                                                                                                                                                                                                                                                                                                                                                                                                                                                                                                                                                                                                                                                                                                                                                                                                                                                                       |
| 87 | #44 AND #49 AND #86                                                                                                                                                                                                                                                                                                                                                                                                                                                                                                                                                                                                                                                                                                                                                                                                                                                                                                                                                                                                                                                                                                                                                                                                                                                                                                                                                                            |
| 88 | #44 AND #49 AND #86 AND [1-1-2013]/sd NOT [31-12-2015]/sd                                                                                                                                                                                                                                                                                                                                                                                                                                                                                                                                                                                                                                                                                                                                                                                                                                                                                                                                                                                                                                                                                                                                                                                                                                                                                                                                      |

## 1.2 Cochrane

|                  |                                                                                                                       |
|------------------|-----------------------------------------------------------------------------------------------------------------------|
| Database name    | Cochrane                                                                                                              |
| Search interface | <a href="http://www.thecochranelibrary.com/view/0/index.html">http://www.thecochranelibrary.com/view/0/index.html</a> |
| Date of search   | 5 March 2016                                                                                                          |
| Time segment     | 2010 to 2016                                                                                                          |
| Search filter    | Controlled clinical trials                                                                                            |

Table Cochrane search strategy

| #  | Search term                                                                                                                                                                                                                                                                                                                                                                                                                                                                                                                                                                                                                                                                                                                                                                                                                                                                                                                                                                                                                                                                                                                                                                                                                                                                                                                                                                                                                                                                           |
|----|---------------------------------------------------------------------------------------------------------------------------------------------------------------------------------------------------------------------------------------------------------------------------------------------------------------------------------------------------------------------------------------------------------------------------------------------------------------------------------------------------------------------------------------------------------------------------------------------------------------------------------------------------------------------------------------------------------------------------------------------------------------------------------------------------------------------------------------------------------------------------------------------------------------------------------------------------------------------------------------------------------------------------------------------------------------------------------------------------------------------------------------------------------------------------------------------------------------------------------------------------------------------------------------------------------------------------------------------------------------------------------------------------------------------------------------------------------------------------------------|
| 1  | MeSH descriptor: [Multiple Myeloma] explode all trees                                                                                                                                                                                                                                                                                                                                                                                                                                                                                                                                                                                                                                                                                                                                                                                                                                                                                                                                                                                                                                                                                                                                                                                                                                                                                                                                                                                                                                 |
| 2  | myeloma*                                                                                                                                                                                                                                                                                                                                                                                                                                                                                                                                                                                                                                                                                                                                                                                                                                                                                                                                                                                                                                                                                                                                                                                                                                                                                                                                                                                                                                                                              |
| 3  | proteasome inhibitor                                                                                                                                                                                                                                                                                                                                                                                                                                                                                                                                                                                                                                                                                                                                                                                                                                                                                                                                                                                                                                                                                                                                                                                                                                                                                                                                                                                                                                                                  |
| 4  | bortezomib                                                                                                                                                                                                                                                                                                                                                                                                                                                                                                                                                                                                                                                                                                                                                                                                                                                                                                                                                                                                                                                                                                                                                                                                                                                                                                                                                                                                                                                                            |
| 5  | (velcade OR ps341 OR "ps-341" OR (ps NEAR/1 341))                                                                                                                                                                                                                                                                                                                                                                                                                                                                                                                                                                                                                                                                                                                                                                                                                                                                                                                                                                                                                                                                                                                                                                                                                                                                                                                                                                                                                                     |
| 6  | lenalidomide                                                                                                                                                                                                                                                                                                                                                                                                                                                                                                                                                                                                                                                                                                                                                                                                                                                                                                                                                                                                                                                                                                                                                                                                                                                                                                                                                                                                                                                                          |
| 7  | revimid OR revlimid OR "cc 5013" OR cc5013 OR "cdc 501" OR "cdc 5013" OR cdc501 OR cdc5013 OR "enmd 0997" OR enmd0997 OR "imid 3" OR imid3                                                                                                                                                                                                                                                                                                                                                                                                                                                                                                                                                                                                                                                                                                                                                                                                                                                                                                                                                                                                                                                                                                                                                                                                                                                                                                                                            |
| 8  | thalidomide                                                                                                                                                                                                                                                                                                                                                                                                                                                                                                                                                                                                                                                                                                                                                                                                                                                                                                                                                                                                                                                                                                                                                                                                                                                                                                                                                                                                                                                                           |
| 9  | thalidomid OR thalimodide OR thalomid OR contergan OR distaval OR isomin OR "k-17" OR kedavon OR kevadon OR neurosedin OR neurosedyne OR "nsc 66847" OR sedalis OR "shin naito" OR softenon OR synovir OR talimol OR talizer OR telagan OR telargan                                                                                                                                                                                                                                                                                                                                                                                                                                                                                                                                                                                                                                                                                                                                                                                                                                                                                                                                                                                                                                                                                                                                                                                                                                   |
| 10 | bendamustine                                                                                                                                                                                                                                                                                                                                                                                                                                                                                                                                                                                                                                                                                                                                                                                                                                                                                                                                                                                                                                                                                                                                                                                                                                                                                                                                                                                                                                                                          |
| 11 | "cimet 3393" OR cytostasan OR cytostasane OR "imet 3393" OR ribomustin OR treanda                                                                                                                                                                                                                                                                                                                                                                                                                                                                                                                                                                                                                                                                                                                                                                                                                                                                                                                                                                                                                                                                                                                                                                                                                                                                                                                                                                                                     |
| 12 | MeSH descriptor: [Dexamethasone] this term only                                                                                                                                                                                                                                                                                                                                                                                                                                                                                                                                                                                                                                                                                                                                                                                                                                                                                                                                                                                                                                                                                                                                                                                                                                                                                                                                                                                                                                       |
| 13 | MeSH descriptor: [Thalidomide] this term only                                                                                                                                                                                                                                                                                                                                                                                                                                                                                                                                                                                                                                                                                                                                                                                                                                                                                                                                                                                                                                                                                                                                                                                                                                                                                                                                                                                                                                         |
| 14 | MeSH descriptor: [Melphalan] this term only                                                                                                                                                                                                                                                                                                                                                                                                                                                                                                                                                                                                                                                                                                                                                                                                                                                                                                                                                                                                                                                                                                                                                                                                                                                                                                                                                                                                                                           |
| 15 | MeSH descriptor: [Vincristine] this term only                                                                                                                                                                                                                                                                                                                                                                                                                                                                                                                                                                                                                                                                                                                                                                                                                                                                                                                                                                                                                                                                                                                                                                                                                                                                                                                                                                                                                                         |
| 16 | MeSH descriptor: [Cyclophosphamide] this term only                                                                                                                                                                                                                                                                                                                                                                                                                                                                                                                                                                                                                                                                                                                                                                                                                                                                                                                                                                                                                                                                                                                                                                                                                                                                                                                                                                                                                                    |
| 17 | MeSH descriptor: [Doxorubicin] this term only                                                                                                                                                                                                                                                                                                                                                                                                                                                                                                                                                                                                                                                                                                                                                                                                                                                                                                                                                                                                                                                                                                                                                                                                                                                                                                                                                                                                                                         |
| 18 | MeSH descriptor: [Carmustine] this term only                                                                                                                                                                                                                                                                                                                                                                                                                                                                                                                                                                                                                                                                                                                                                                                                                                                                                                                                                                                                                                                                                                                                                                                                                                                                                                                                                                                                                                          |
| 19 | MeSH descriptor: [Prednisone] this term only                                                                                                                                                                                                                                                                                                                                                                                                                                                                                                                                                                                                                                                                                                                                                                                                                                                                                                                                                                                                                                                                                                                                                                                                                                                                                                                                                                                                                                          |
| 20 | MeSH descriptor: [Prednisolone] this term only                                                                                                                                                                                                                                                                                                                                                                                                                                                                                                                                                                                                                                                                                                                                                                                                                                                                                                                                                                                                                                                                                                                                                                                                                                                                                                                                                                                                                                        |
| 21 | ('aeroseb dex' OR afflucoson* OR anaflogistico OR arcodexan* OR azium OR calonat OR cebedex OR colofam OR cortidron* OR cortisumman OR dacortin* OR dalalone OR decacortin OR decadelton* OR decadion OR decadr*n* OR decaesadriil OR decamethasone OR decasone OR decaspray OR decasterolone OR decilone OR decofluor OR dectancyl OR decaort OR delladec OR deltafluoren OR deltafluorene OR dergramin OR deronil OR desacort OR desacortone OR desadrene OR desalark OR desameton* OR 'dexa cortisyl' OR 'dexa dabrosan' OR 'dexa korti' OR 'dexa scherosan' OR 'dexa scherozon' OR 'dexa scherozone' OR dexachel OR dexacort* OR dexadabrosan OR dexadecadrol OR dexadrol OR dexagen OR dexahelvacort OR dexakorti OR dexalocal OR dexamecortin OR dexameson* OR dexametason* OR dexameth OR dexametha*on* OR dexamethonium OR dexan OR dexane OR dexapot OR dexaschero*on* OR dexason* OR dexinoral OR dexionil OR dexone OR dextelan OR dezone OR doxamethasone OR esacortene OR exadion* OR firmalone OR fluormone OR fluorocort OR fluorodelta OR fortectortin OR gammacorten* OR grosodexon* OR hexadecad*ol OR hexadiol OR hexadrol OR isnacort OR isoptodex OR isoptomaxidex OR 'lokalison f' OR luxazone OR marvidione OR maxidex OR mediamethasone OR megacortin OR mephameson* OR metasolon* OR methazonion* OR millicorten OR millicortenol OR 'mk 125' OR mk125 OR nisomethasone OR novocort OR 'nsc 34521' OR nsc34521 OR opticorten OR opticortinol OR oradex*n* OR |

| #  | Search term                                                                                                                                                                                                                                                                                                                                                                                                                                                                                                                                                                                                                                                                                                                                                                                                                                                                                                                                                                                                                                                                                                                                                                                                                                                                                                                                                                                                                                                                                             |
|----|---------------------------------------------------------------------------------------------------------------------------------------------------------------------------------------------------------------------------------------------------------------------------------------------------------------------------------------------------------------------------------------------------------------------------------------------------------------------------------------------------------------------------------------------------------------------------------------------------------------------------------------------------------------------------------------------------------------------------------------------------------------------------------------------------------------------------------------------------------------------------------------------------------------------------------------------------------------------------------------------------------------------------------------------------------------------------------------------------------------------------------------------------------------------------------------------------------------------------------------------------------------------------------------------------------------------------------------------------------------------------------------------------------------------------------------------------------------------------------------------------------|
|    | orgadrone OR policort OR posurdex OR prodexona OR prodexone OR sanamethasone OR spoloven OR triamcimetil OR visumethazone):ti,ab,kw                                                                                                                                                                                                                                                                                                                                                                                                                                                                                                                                                                                                                                                                                                                                                                                                                                                                                                                                                                                                                                                                                                                                                                                                                                                                                                                                                                     |
| 22 | (melph*lan OR alkeran OR 'cb 3025' OR cb3025 OR 'levo sarcolysin' OR levofalan OR melfalan OR melphalon OR 'nsc 8806' OR nsc8806 OR 'phenylalanine 2037' OR 'phenylalanine mustard'):ti,ab,kw                                                                                                                                                                                                                                                                                                                                                                                                                                                                                                                                                                                                                                                                                                                                                                                                                                                                                                                                                                                                                                                                                                                                                                                                                                                                                                           |
| 23 | (vincristine OR vincristin OR '137231' OR 137231 OR 'vin cristine' OR vincrisul):ti,ab,kw                                                                                                                                                                                                                                                                                                                                                                                                                                                                                                                                                                                                                                                                                                                                                                                                                                                                                                                                                                                                                                                                                                                                                                                                                                                                                                                                                                                                               |
| 24 | (cyclophosphamide OR 'b 518' OR b518 OR carloxan OR clafen OR cycloblastin* OR 'cyclofos amide' OR cyclofosamid* OR cyclophosphamid* OR cyclophosphan* OR cyclostin OR cycloxan OR cyphos OR cytophosphan* OR cytoxan OR 'endocyclo phosphate' OR end*xan* OR genoxal OR 'mitoxan neosan' OR neosar OR noristan OR 'nsc 26271' OR 'nsc 2671' OR procytox OR procytoxide OR se*doxan):ti,ab,kw                                                                                                                                                                                                                                                                                                                                                                                                                                                                                                                                                                                                                                                                                                                                                                                                                                                                                                                                                                                                                                                                                                           |
| 25 | (doxorubicin OR adriablastin OR adriablastin* AND adriacin OR adriamicin* OR adriblastin* OR caelyx OR doxil OR doxorubicine OR 'fi 106' OR fi106 OR lipodox OR myocet OR 'nsc 123127' OR nsc123127 OR rastocin OR resmycin OR 'rp 25253' OR rp25253 OR rubex OR sarcodoxome OR 'tlc d 99'):ti,ab,kw                                                                                                                                                                                                                                                                                                                                                                                                                                                                                                                                                                                                                                                                                                                                                                                                                                                                                                                                                                                                                                                                                                                                                                                                    |
| 26 | (carmustine OR bcnu OR bicnu OR carmubis OR carmubris OR carmustin OR gliadel OR nitrumon OR 'nsc 409962'):ti,ab,kw                                                                                                                                                                                                                                                                                                                                                                                                                                                                                                                                                                                                                                                                                                                                                                                                                                                                                                                                                                                                                                                                                                                                                                                                                                                                                                                                                                                     |
| 27 | (prednisone OR ancortone OR biocortone OR colisone OR cortidelt OR 'de cortisyl' OR decortancyl OR de*ortin* OR dehydrocortisone OR delitisona OR deltacort*n* OR deltacortisone OR deltasone OR deltra OR 'di-adreson' OR diadreson OR en*orton* OR hostacortin OR insone OR meprison OR metacortandracin OR meticorten OR meticortine OR 'nsc 10023' OR nsc10023 OR orasone* OR paracort OR precort OR precortal OR prednisone* OR pronizone OR rectodelt OR ultracorten OR urtilone):ti,ab,kw                                                                                                                                                                                                                                                                                                                                                                                                                                                                                                                                                                                                                                                                                                                                                                                                                                                                                                                                                                                                        |
| 28 | (prednisolone OR antisolon* OR aprednislon* OR benisolon* OR berisolon* OR caberdelta OR 'co hydeltra' OR codelcortone OR cortadelton* OR cortelinter OR cortisolone OR dacortin OR decortril OR dehydrocortex OR dehydrocortisol* OR dehydrohydrocortison* OR delcortol OR deltacortef OR deltacortenolo OR deltacortil OR deltacortoil OR deltaderm OR deltaglycortril OR deltaglycortol OR deltaglycortol* OR deltaophticor OR deltasolone OR deltastab OR deltidrosol OR deltilsilone OR deltilsolon* OR deltolasson* OR deltoson* OR dicortol OR domucortone OR encort*lon* OR glistelone OR hostacortin OR hydeltra OR hydeltrone OR hydrelta OR hydrocortancyl OR hydrocortidelt OR hydrodeltalone OR hydrodeltisone OR hydroretrocortin* OR inflanefran OR insolone OR keteocort OR leocortol OR mediasolone OR meprisolon* OR metacortalon* OR metacortandralon* OR metacortelone OR meticortelone OR metiderm OR morlone OR mydrapred OR nisolon OR nisolone OR 'nsc 9120' OR nsc9120 OR panafcortolone OR panafort OR paracortol OR phlogex OR precortalon OR precortancyl OR precortisyl OR predartrin* OR prednedome OR prednelan OR prednicoelin OR prednicort OR prednicortelone OR prednifor OR predniment OR predniretard OR prednis OR prednivet OR prednorsolon* OR predonine OR predorgasolon* OR prelone OR prenlone OR prezolon OR scherisolone OR serilone OR solone OR solupren* OR spiricort OR spolutane OR sterolone OR supercorti*ol OR taracortelone OR wysolone):ti,ab,kw |
| 29 | pomalidomide                                                                                                                                                                                                                                                                                                                                                                                                                                                                                                                                                                                                                                                                                                                                                                                                                                                                                                                                                                                                                                                                                                                                                                                                                                                                                                                                                                                                                                                                                            |
| 30 | (imnovid OR pomalyst OR "cc-4047" OR "cc 4047" OR cc4047):ti,ab,kw                                                                                                                                                                                                                                                                                                                                                                                                                                                                                                                                                                                                                                                                                                                                                                                                                                                                                                                                                                                                                                                                                                                                                                                                                                                                                                                                                                                                                                      |
| 31 | panobinostat                                                                                                                                                                                                                                                                                                                                                                                                                                                                                                                                                                                                                                                                                                                                                                                                                                                                                                                                                                                                                                                                                                                                                                                                                                                                                                                                                                                                                                                                                            |
| 32 | (farydak OR "lbh-589" OR "lbh589" OR "lbh 589"):ti,ab,kw                                                                                                                                                                                                                                                                                                                                                                                                                                                                                                                                                                                                                                                                                                                                                                                                                                                                                                                                                                                                                                                                                                                                                                                                                                                                                                                                                                                                                                                |
| 33 | carfilzomib                                                                                                                                                                                                                                                                                                                                                                                                                                                                                                                                                                                                                                                                                                                                                                                                                                                                                                                                                                                                                                                                                                                                                                                                                                                                                                                                                                                                                                                                                             |
| 34 | (kyprolis OR "pr-171" OR "pr171" OR "pr 171"):ti,ab,kw                                                                                                                                                                                                                                                                                                                                                                                                                                                                                                                                                                                                                                                                                                                                                                                                                                                                                                                                                                                                                                                                                                                                                                                                                                                                                                                                                                                                                                                  |
| 35 | daratumumab                                                                                                                                                                                                                                                                                                                                                                                                                                                                                                                                                                                                                                                                                                                                                                                                                                                                                                                                                                                                                                                                                                                                                                                                                                                                                                                                                                                                                                                                                             |
| 36 | (darzalex):ti,ab,kw                                                                                                                                                                                                                                                                                                                                                                                                                                                                                                                                                                                                                                                                                                                                                                                                                                                                                                                                                                                                                                                                                                                                                                                                                                                                                                                                                                                                                                                                                     |
| 37 | ixazomib                                                                                                                                                                                                                                                                                                                                                                                                                                                                                                                                                                                                                                                                                                                                                                                                                                                                                                                                                                                                                                                                                                                                                                                                                                                                                                                                                                                                                                                                                                |
| 38 | (ninlaro OR mln9708 OR "mln 9708" OR "mln-9708" OR (proteasome NEXT/1 inhibit*)):ti,ab,kw                                                                                                                                                                                                                                                                                                                                                                                                                                                                                                                                                                                                                                                                                                                                                                                                                                                                                                                                                                                                                                                                                                                                                                                                                                                                                                                                                                                                               |
| 39 | elotuzumab                                                                                                                                                                                                                                                                                                                                                                                                                                                                                                                                                                                                                                                                                                                                                                                                                                                                                                                                                                                                                                                                                                                                                                                                                                                                                                                                                                                                                                                                                              |
| 40 | (empliciti OR HuLuc63 OR BMS-901608):ti,ab,kw                                                                                                                                                                                                                                                                                                                                                                                                                                                                                                                                                                                                                                                                                                                                                                                                                                                                                                                                                                                                                                                                                                                                                                                                                                                                                                                                                                                                                                                           |
| 41 | (#3 OR #4 OR #5 OR #6 OR #7 OR #8 OR #9 OR #10 OR #11 OR #12 OR #13 OR #14 OR #15 OR #16 OR #17 OR #18 OR #19 OR #20 OR #21 OR #22 OR #23 OR #24 OR #25 OR #26 OR #27 OR #28 OR #29 OR #30 OR #31 OR #32 OR #33 OR #34 OR #35 OR #36 OR #37 OR #38 OR #39 OR #40)                                                                                                                                                                                                                                                                                                                                                                                                                                                                                                                                                                                                                                                                                                                                                                                                                                                                                                                                                                                                                                                                                                                                                                                                                                       |
| 42 | (#1 OR #2)                                                                                                                                                                                                                                                                                                                                                                                                                                                                                                                                                                                                                                                                                                                                                                                                                                                                                                                                                                                                                                                                                                                                                                                                                                                                                                                                                                                                                                                                                              |
| 31 | (#41 AND #42)                                                                                                                                                                                                                                                                                                                                                                                                                                                                                                                                                                                                                                                                                                                                                                                                                                                                                                                                                                                                                                                                                                                                                                                                                                                                                                                                                                                                                                                                                           |

| #  | Search term                                                 |
|----|-------------------------------------------------------------|
| 32 | (#41 AND #42), Publication Year from 2013 to 2015 in Trials |



### 1.3 MEDLINE® In-Process

Database name MEDLINE® In-Process  
Search interface <http://www.ncbi.nlm.nih.gov/pubmed/>  
Date of search 5 March 2016  
Time segment None  
Search filter Limited to In-Process citations

Table MEDLINE® In-Process search

| #  | Search term                 |
|----|-----------------------------|
| 1  | Search myeloma*             |
| 2  | Search Bortezomib           |
| 3  | Search Lenalidomide         |
| 4  | Search Thalidomide          |
| 5  | Search Bendamustine         |
| 6  | Search Dexamethasone        |
| 7  | Search Melphalan            |
| 8  | Search Vincristine          |
| 9  | Search Cyclophosphamide     |
| 10 | Search Doxorubicin          |
| 11 | Search Carmustine           |
| 12 | Search Prednisone           |
| 13 | Search Prednisolone         |
| 14 | Search velcade              |
| 15 | Search proteasome inhibitor |
| 16 | Search revlimid             |
| 17 | Search treanda              |
| 18 | Search cytoxan              |
| 19 | Search endoxan              |
| 20 | Search neosar               |
| 21 | Search adriamycin           |
| 22 | Search caelyx               |
| 23 | Search doxil                |
| 24 | Search gliadel              |
| 25 | Search ancortone            |
| 26 | Search encortone            |
| 27 | Search pomalidomide         |
| 28 | Search imnovid              |

| #  | Search term                                                                                                                                                                                                                                                                                                                                  |
|----|----------------------------------------------------------------------------------------------------------------------------------------------------------------------------------------------------------------------------------------------------------------------------------------------------------------------------------------------|
| 29 | Search pomalyst                                                                                                                                                                                                                                                                                                                              |
| 30 | Search panobinostat                                                                                                                                                                                                                                                                                                                          |
| 31 | Search farydak                                                                                                                                                                                                                                                                                                                               |
| 32 | Search carfilzomib                                                                                                                                                                                                                                                                                                                           |
| 33 | Search kyprolis                                                                                                                                                                                                                                                                                                                              |
| 34 | Search daratumumab                                                                                                                                                                                                                                                                                                                           |
| 35 | Search darzalex                                                                                                                                                                                                                                                                                                                              |
| 36 | Search ixazomib                                                                                                                                                                                                                                                                                                                              |
| 37 | Search ninlaro                                                                                                                                                                                                                                                                                                                               |
| 38 | Search elotuzumab                                                                                                                                                                                                                                                                                                                            |
| 39 | Search empliciti                                                                                                                                                                                                                                                                                                                             |
| 40 | Search ((((((((((((((((((((((((((((((((((#2) OR #3) OR #4) OR #5) OR #6) OR #7) OR #8) OR #9) OR #10) OR #11) OR #12) OR #13) OR #14) OR #15) OR #16) OR #17) OR #18) OR #19) OR #20) OR #21) OR #22) OR #23) OR #24) OR #25) OR #26) OR #27) OR #28) OR #29) OR #30) OR #31) OR #32) OR #33) OR #34) OR #35) OR #36) OR #37) OR #38) OR #39 |
| 41 | Search (#1) AND #40                                                                                                                                                                                                                                                                                                                          |
| 42 | Search #41 AND inprocess[sb]                                                                                                                                                                                                                                                                                                                 |

#### 1.4 Trials in progress

**Database name** [Clinicaltrials.gov](http://www.clinicaltrials.gov)  
**Search interface** <http://www.clinicaltrial.gov>  
**Date of search** 21 June 2016  
**Time segment** None  
**Search filter** Limited to randomised, interventional studies in multiple myeloma

Table Search strategy for trials in progress

| # | Search term                                                                                                     |
|---|-----------------------------------------------------------------------------------------------------------------|
| 1 | Search term: random*<br>Limited to condition: multiple myeloma<br>Limited to study type: interventional studies |

## Appendix 2 Inclusion and exclusion criteria

### Inclusion criteria

#### **Population:**

Age: adults aged  $\geq 18$  years

Gender: any

Race: any

Stage of disease: any

Line of therapy:

Any (for chemotherapy setting)

First-line (for transplant setting)

Type of therapy

Any (for chemotherapy setting)

Pre-transplant induction therapy (for transplant setting)

Post-transplant consolidation or maintenance therapy (for transplant setting)

#### **Interventions:**

Pre-specified novel treatments options

Bortezomib

Lenalidomide

Thalidomide

Bendamustine

Comparators:

Pre-specified novel treatments options

Bortezomib

Lenalidomide

Thalidomide

Bendamustine

Pre-specified conventional treatments options

Dexamethasone

Melphalan

Vincristine

Cyclophosphamide

Doxorubicin

Liposomal doxorubicin

Carmustine

Prednisone

Prednisolone

Placebo/no treatment

Publication timeframe:

1999 onwards for database searches

Last 4 years for conference searching

### Exclusion criteria

Study design:

RCTs with any blinding status

Non-randomised controlled clinical trials

Uncontrolled clinical trials (single arm studies)

Observational studies

Language restrictions:

English only

Phase I studies

Pharmacokinetic studies

No subgroup analysis for MM

Conference abstracts published prior to 2008

Conference abstracts (other than those searched for this review) published after 2008 (retrieved from the literature database)

Transplant setting

Preparative regimen

Conditioning regimen

Mobilisation regimen

### Appendix 3.1 PRISMA checklist

| Section/topic             | #  | Checklist item                                                                                                                                                                                                                                                                                              | Reported on page # |
|---------------------------|----|-------------------------------------------------------------------------------------------------------------------------------------------------------------------------------------------------------------------------------------------------------------------------------------------------------------|--------------------|
| <b>TITLE</b>              |    |                                                                                                                                                                                                                                                                                                             |                    |
| Title                     | 1  | Identify the report as a systematic review, meta-analysis, or both.                                                                                                                                                                                                                                         | 1                  |
| <b>ABSTRACT</b>           |    |                                                                                                                                                                                                                                                                                                             |                    |
| Structured summary        | 2  | Provide a structured summary including, as applicable: background; objectives; data sources; study eligibility criteria, participants, and interventions; study appraisal and synthesis methods; results; limitations; conclusions and implications of key findings; systematic review registration number. | 3                  |
| <b>INTRODUCTION</b>       |    |                                                                                                                                                                                                                                                                                                             |                    |
| Rationale                 | 3  | Describe the rationale for the review in the context of what is already known.                                                                                                                                                                                                                              | 6                  |
| Objectives                | 4  | Provide an explicit statement of questions being addressed with reference to participants, interventions, comparisons, outcomes, and study design (PICOS).                                                                                                                                                  | 6                  |
| <b>METHODS</b>            |    |                                                                                                                                                                                                                                                                                                             |                    |
| Protocol and registration | 5  | Indicate if a review protocol exists, if and where it can be accessed (e.g., Web address), and, if available, provide registration information including registration number.                                                                                                                               | 6                  |
| Eligibility criteria      | 6  | Specify study characteristics (e.g., PICOS, length of follow-up) and report characteristics (e.g., years considered, language, publication status) used as criteria for eligibility, giving rationale.                                                                                                      | 6                  |
| Information sources       | 7  | Describe all information sources (e.g., databases with dates of coverage, contact with study authors to identify additional studies) in the search and date last searched.                                                                                                                                  | 6                  |
| Search                    | 8  | Present full electronic search strategy for at least one database, including any limits used, such that it could be repeated.                                                                                                                                                                               | 6<br>(appendix 1)  |
| Study selection           | 9  | State the process for selecting studies (i.e., screening, eligibility, included in systematic review, and, if applicable, included in the meta-analysis).                                                                                                                                                   | 6<br>(appendix 2)  |
| Data collection process   | 10 | Describe method of data extraction from reports (e.g., piloted forms, independently, in duplicate) and any processes for obtaining and confirming data from investigators.                                                                                                                                  | 7                  |

|                                    |    |                                                                                                                                                                                                                        |            |
|------------------------------------|----|------------------------------------------------------------------------------------------------------------------------------------------------------------------------------------------------------------------------|------------|
| Data items                         | 11 | List and define all variables for which data were sought (e.g., PICOS, funding sources) and any assumptions and simplifications made.                                                                                  | 7          |
| Risk of bias in individual studies | 12 | Describe methods used for assessing risk of bias of individual studies (including specification of whether this was done at the study or outcome level), and how this information is to be used in any data synthesis. | Appendix 3 |
| Summary measures                   | 13 | State the principal summary measures (e.g., risk ratio, difference in means).                                                                                                                                          | 7          |
| Synthesis of results               | 14 | Describe the methods of handling data and combining results of studies, if done, including measures of consistency (e.g., $I^2$ ) for each meta-analysis.                                                              | 8          |

Page 1 of 2

| Section/topic                 | #  | Checklist item                                                                                                                                                                                           | Reported on page # |
|-------------------------------|----|----------------------------------------------------------------------------------------------------------------------------------------------------------------------------------------------------------|--------------------|
| Risk of bias across studies   | 15 | Specify any assessment of risk of bias that may affect the cumulative evidence (e.g., publication bias, selective reporting within studies).                                                             | Appendix 3         |
| Additional analyses           | 16 | Describe methods of additional analyses (e.g., sensitivity or subgroup analyses, meta-regression), if done, indicating which were pre-specified.                                                         | 8                  |
| <b>RESULTS</b>                |    |                                                                                                                                                                                                          |                    |
| Study selection               | 17 | Give numbers of studies screened, assessed for eligibility, and included in the review, with reasons for exclusions at each stage, ideally with a flow diagram.                                          | 8-9 (Figure 1)     |
| Study characteristics         | 18 | For each study, present characteristics for which data were extracted (e.g., study size, PICOS, follow-up period) and provide the citations.                                                             | 9 (Table 1)        |
| Risk of bias within studies   | 19 | Present data on risk of bias of each study and, if available, any outcome level assessment (see item 12).                                                                                                | Appendix 3         |
| Results of individual studies | 20 | For all outcomes considered (benefits or harms), present, for each study: (a) simple summary data for each intervention group (b) effect estimates and confidence intervals, ideally with a forest plot. | 9 (Table 1)        |
| Synthesis of results          | 21 | Present results of each meta-analysis done, including confidence intervals and measures of consistency.                                                                                                  | 10-11 (Figure 3)   |
| Risk of bias across studies   | 22 | Present results of any assessment of risk of bias across studies (see Item 15).                                                                                                                          | Appendix 3         |

|                     |    |                                                                                                                                                                                      |                                |
|---------------------|----|--------------------------------------------------------------------------------------------------------------------------------------------------------------------------------------|--------------------------------|
| Additional analysis | 23 | Give results of additional analyses, if done (e.g., sensitivity or subgroup analyses, meta-regression [see Item 16]).                                                                | 11-12<br>(Appendix 5, 6, 7, 8) |
| <b>DISCUSSION</b>   |    |                                                                                                                                                                                      |                                |
| Summary of evidence | 24 | Summarize the main findings including the strength of evidence for each main outcome; consider their relevance to key groups (e.g., healthcare providers, users, and policy makers). | 12-16                          |
| Limitations         | 25 | Discuss limitations at study and outcome level (e.g., risk of bias), and at review-level (e.g., incomplete retrieval of identified research, reporting bias).                        | 12-16                          |
| Conclusions         | 26 | Provide a general interpretation of the results in the context of other evidence, and implications for future research.                                                              | 12-16                          |
| <b>FUNDING</b>      |    |                                                                                                                                                                                      |                                |
| Funding             | 27 | Describe sources of funding for the systematic review and other support (e.g., supply of data); role of funders for the systematic review.                                           | 8                              |

From: Moher D, Liberati A, Tetzlaff J, Altman DG, The PRISMA Group (2009). Preferred Reporting Items for Systematic Reviews and Meta-Analyses: The PRISMA Statement. PLoS Med 6(7): e1000097. doi:10.1371/journal.pmed1000097

For more information, visit: [www.prisma-statement.org](http://www.prisma-statement.org).

### Appendix 3.2 Risk of bias assessment using the Cochrane Collaboration's tool

| Author | Year | Random sequence generation (selection bias) | Allocation concealment (selection bias) | Blinding of participants and personnel (performance bias) | Blinding of outcome assessors: efficacy (detection bias) | Blinding of outcome assessors: safety (detection bias) | Incomplete outcome data: efficacy (attrition bias) | Incomplete outcome data: safety (attrition bias) | Selective reporting (reporting bias) | Other bias |
|--------|------|---------------------------------------------|-----------------------------------------|-----------------------------------------------------------|----------------------------------------------------------|--------------------------------------------------------|----------------------------------------------------|--------------------------------------------------|--------------------------------------|------------|
| Facon  | 2006 | Low risk                                    | Low risk                                | High risk                                                 | Low risk                                                 | Low risk                                               | Unclear                                            | Unclear                                          | Unclear                              | High risk  |
| Facon  | 2007 | Low risk                                    | Unclear                                 | High risk                                                 | Low risk                                                 | Low risk                                               | High risk                                          | High risk                                        | Unclear                              | High risk  |
| Morgan | 2013 | Low risk                                    | Unclear                                 | High risk                                                 | Low risk                                                 | Low risk                                               | Unclear                                            | Unclear                                          | Unclear                              | Low risk   |

|             |      |          |          |           |          |          |           |           |         |           |
|-------------|------|----------|----------|-----------|----------|----------|-----------|-----------|---------|-----------|
| Rajkumar    | 2008 | Low risk | Low risk | Low risk  | Low risk | Low risk | Unclear   | Unclear   | Unclear | Low risk  |
| Ludwig      | 2009 | Low risk | Low risk | High risk | Low risk | Low risk | Unclear   | Unclear   | Unclear | Unclear   |
| Palumbo     | 2008 | Low risk | Low risk | High risk | Low risk | Low risk | High risk | High risk | Unclear | High risk |
| Hulin       | 2009 | Low risk | Unclear  | Low risk  | Low risk | Low risk | Low risk  | Low risk  | Unclear | Low risk  |
| Waage       | 2010 | Low risk | Low risk | Low risk  | Low risk | Low risk | Unclear   | Unclear   | Unclear | Low risk  |
| Beksac      | 2010 | Low risk | Low risk | High risk | Low risk | Low risk | Unclear   | Unclear   | Unclear | Low risk  |
| Wijermans   | 2010 | Low risk | Unclear  | High risk | Low risk | Low risk | Unclear   | Unclear   | Unclear | High risk |
| Sacchi      | 2011 | Low risk | Low risk | High risk | Low risk | Low risk | Unclear   | Unclear   | Unclear | Low risk  |
| Hungria     | 2016 | Low risk | Unclear  | High risk | Low risk | Low risk | Low risk  | Low risk  | Unclear | High risk |
| San Miguel  | 2008 | Low risk | Unclear  | High risk | Low risk | Low risk | Low risk  | Low risk  | Unclear | Low risk  |
| Mateos      | 2014 | Low risk | Low risk | High risk | Low risk | Low risk | Low risk  | Low risk  | Unclear | Low risk  |
| Niesvizky   | 2015 | Low risk | Low risk | High risk | Low risk | Low risk | Low risk  | Low risk  | Unclear | Low risk  |
| Palumbo     | 2014 | Low risk | Unclear  | Unclear   | Low risk | Low risk | Low risk  | Low risk  | Unclear | Low risk  |
| Zonder      | 2011 | Low risk | Unclear  | High risk | Low risk | Low risk | Low risk  | Unclear   | Unclear | High risk |
| Benboubkher | 2014 | Low risk | Low risk | High risk | Low risk | Low risk | Low risk  | Low risk  | Unclear | Low risk  |
| Zweegman    | 2016 | Low risk | Low risk | High risk | Low risk | Low risk | Unclear   | Unclear   | Unclear | Low risk  |
| Stewart     | 2015 | Low risk | Low risk | High risk | Low risk | Low risk | Low risk  | Low risk  | Unclear | Low risk  |
| Magarotto   | 2016 | Low risk | Unclear  | High risk | Low risk | Low risk | Unclear   | Unclear   | Unclear | Low risk  |
| Palumbo     | 2012 | Low risk | Unclear  | Low risk  | Low risk | Low risk | Low risk  | Low risk  | Unclear | Low risk  |
| Durie       | 2017 | Low risk | Low risk | High risk | Low risk | Low risk | Unclear   | Unclear   | Unclear | High risk |
| Mateos      | 2018 | Low risk | Low risk | High risk | Low risk | Low risk | Low risk  | Low risk  | Unclear | Low risk  |





## Appendix 4 R script Netmeta

```
#####  
#####  
# Network meta-analysis of newly diagnosed not transplant eligible multiple myeloma treatments  
# using R-package netmeta  
# accompanying publication titled "Efficacy of first-line treatments for multiple myeloma patients not eligible for  
# stem cell transplantation - A Network Meta-analysis"  
# by Blommestein & Van Beurden-Tan et al. (2018)  
#####  
#####  
#install.packages("netmeta")  
  
# set working directory  
setwd("C:/R netmeta")  
  
#####  
# The Multiple Myeloma data.  
#####  
  
# Data abstracted from phase III randomized controlled trials found in systematic literature review  
# with time period 01 January 1999 to 01 March 2016  
  
# Data is entered as contrast-level data to be used in the 'netmeta' package.  
  
# We stored this data into a data.frame called 'myeloma_data'.  
  
# myeloma_data had the columns:  
# TE (holding relative treatment effect estimates for pairs of treatments within studies, ie. log hazard ratio),  
# seTE (holding standard errors for the treatment effect estimates TE),  
# treat1.long (holding treatment names for the first of a pair of treatments),  
# treat2.long (holding treatment names for the second of a pair of treatments),  
# treat1 (holding abbreviated treatment names for the first of a pair of treatments),  
# treat2 (holding abbreviated treatment names for the second of a pair of treatments),  
# studlabel (holding study labels)  
  
# Load the data:  
myeloma_data = read.csv("data/TNEMM_NMA_data.csv") # Read data file; must be in curr. work. dir.  
  
##### Load required R packages #####  
  
# netmeta (version 0.9-7, built under R version 3.3.3)  
library("netmeta")  
  
##### Prepare data for package #####  
  
# Note: Data (myeloma_data) is imported as contrast-level.  
# Data is ready as loaded in.  
  
##### Choose and run model #####  
  
net1 <- netmeta(TE, seTE, treat1, treat2, studlab, data=myeloma_data, sm="HR",
```

```
details.chkmultiarm=TRUE, comb.random=TRUE, reference.group="D",
tol.multiarm = 0.05)
```

```
##### Draw network #####
```

```
netgraph(net1)
netgraph(net1, dim="3d")
```

```
##### Assess the degree of heterogeneity and inconsistency #####
```

```
# Heterogeneity and inconsistency statistics.
```

```
net1$Q
net1$df
net1$pval.Q
net1$Q.heterogeneity
net1$Q.inconsistency
net1$I2
```

```
# A graphical tool for locating inconsistency in network meta-analyses.
```

```
netheat(net1, random=TRUE)
```

```
##### Report relative effect estimates #####
```

```
# To produce summary of netmeta model
```

```
summary(net1,ref="D",digits=2)
```

```
# Rank treatments
```

```
net1.rank<-netrank(net1, small.values = "good")
```

```
# Forest plot
```

```
forest.netmeta(net1, reference.group = "D", sortvar = -net1.rank$Pscore.random, digits.Pscore = 2,
  leftcols="studlab", leftlabs="Treatment", rightcols=c("effect", "ci", "Pscore"),
  rightlabs="P-Score", just.addcols="right", xlab="HR progression-free survival", label.right="      Favors `D`",
  label.left="Favors other treatment      ", xlim=c(0.05,20))
```

```
forest.netmeta(net1, reference.group = "MPT/MPT-T", sortvar = -net1.rank$Pscore.random, digits.Pscore = 2,
  leftcols="studlab", leftlabs="Treatment", rightcols=c("effect", "ci", "Pscore"),
  rightlabs="P-Score", just.addcols="right", xlab="HR progression-free survival", label.right="      Favors
`MPT/MPT-T`",
  label.left="Favors other treatment      ", xlim=c(0.1,10))
```

```
# Split direct and indirect evidence in network meta-analysis
```

```
options(max.print=1000000)
```

```
netsplit(net1)
```

```
#####
```

```
# SCENARIO ANALYSES
```

```
#
```

```
# #1: differentiate between MPT and MPT-T (thal maintenance split) [MPT-T: GIMEMA, HOVON49, TMSG, NMSG,
      HOVON87, E1A06]
```

```
# #2: Weisel replication (VISTA, IFM 01/01, IFM 99/66, Sacchi and FIRST)
```

```
# #3: Fixed effect model
```

```
#####
```

```
##### SA1: Different grouping for Thal maintenance (MPT-T and MPT)
```

```

# Load the data:
mmData1 = read.csv("data/TNEMM_NMA_data-ThalMaintSA.csv")

# Model
net1.ThalSA <- netmeta(TE, seTE, treat1, treat2, studlab, data=mmData1, sm="HR",
  details.chkmultiarm=TRUE, comb.random=TRUE, reference.group="D",
  tol.multiarm = 0.05)

# Rank treatments
net1.ThalSA.rank<-netrank(net1.ThalSA, small.values = "good")

# Forest plot
forest.netmeta(net1.ThalSA, reference.group = "D", sortvar = -net1.ThalSA.rank$Pscore.random, digits.Pscore = 2,
  leftcols="studlab", leftlabs="Treatment", rightcols=c("effect", "ci", "Pscore"),
  rightlabs="P-Score", just.addcols="right" , xlab="HR progression-free survival", label.right="          Favors D",
  label.left="Favors other treatment          ", xlim=c(0.05,20))

##### SA2: Weisel replication (VISTA, IFM 01/01, IFM 99/66, Sacchi and FIRST)

# Load the data:
mmData2 = read.csv("data/TNEMM_NMA_data-Weisel.csv")

# Fixed effect model
net1.Weis <- netmeta(TE, seTE, treat1, treat2, studlab, data=mmData2, sm="HR",
  details.chkmultiarm=TRUE, comb.random=TRUE, reference.group="Rd")

# Rank treatments
net1.Weis.rank<-netrank(net1.Weis, small.values = "good")

# Forest plot
forest(net1.Weis, ref="Rd", sortvar = -net1.Weis.rank$Pscore.random , digits.Pscore = 2,
  leftcols="studlab", leftlabs="Treatment", rightcols=c("effect", "ci", "Pscore"),
  rightlabs="P-Score", just.addcols="right" , xlab="HR progression-free survival", label.right="          Favors RD",
  label.left="Favors other treatment          ", xlim=c(0.2,5) )

##### SA3: Fixed effect model
net1.FE <- netmeta(TE, seTE, treat1, treat2, studlab, data=myeloma_data, sm="HR",
  details.chkmultiarm=TRUE, comb.random=FALSE, reference.group="D",
  tol.multiarm = 0.05)

net1.FE.rank<-netrank(net1.FE, small.values = "good")

forest(net1.FE, ref="D", sortvar = -net1.FE.rank$Pscore.random, digits.Pscore = 2,
  leftcols="studlab", leftlabs="Treatment", rightcols=c("effect", "ci", "Pscore"),
  rightlabs="P-Score", just.addcols="right" , xlab="HR progression-free survival", label.right="          Favors D",
  label.left="Favors other treatment          ", xlim=c(0.05,20) )
#####

##### END NETMETA R SCRIPT

#####

```

#####

# DATA

#

# #1: main analysis

# #2: scenario analysis #1 Different grouping for Thal maintenance (MPT-T and MPT)

# #3: scenario analysis #2 Replicating Weisel's NMA

# #4: scenario analysis #4 Fixed effect model

#####

##### #1: data for main analysis [[file name: TNEMM\_NMA\_data.csv]]

| TE       | seTE     | treat1    | treat2    | studlab      |
|----------|----------|-----------|-----------|--------------|
| -0.70694 | 0.132986 | TD        | D         | Rajkumar2008 |
| 0.26266  | 0.160183 | TD        | MP        | Ludwig2009   |
| -0.47235 | 0.133484 | MPT/MPT-T | MP        | Palumbo2008  |
| -0.48749 | 0.147472 | MPT/MPT-T | MP        | IFM-01/01    |
| -0.11723 | 0.122169 | MPT/MPT-T | MP        | NMSG         |
| -0.35525 | 0.261358 | MPT/MPT-T | MP        | TMSG         |
| -0.23902 | 0.12195  | MPT/MPT-T | MP        | HOVON49      |
| -0.40103 | 0.289061 | MPT/MPT-T | MP        | Sacchi2011   |
| -0.22754 | 0.136104 | VMP       | VTP       | GEM2005      |
| -0.21647 | 0.078876 | CTD(a)    | MP        | MRC-MIX      |
| -0.58344 | 0.176245 | VMP       | MP        | VISTA        |
| -0.54876 | 0.10524  | VMPT-VT   | VMP       | GIMEMA0305   |
| -0.58867 | 0.180076 | Rd        | D         | S0232        |
| -0.14464 | 0.093809 | MPR-R     | MPT/MPT-T | HOVON87      |
| -0.33927 | 0.117128 | VRd       | Rd        | S0777        |
| -0.18005 | 0.135835 | MPT/MPT-T | MPR-R     | E1A06        |
| -0.69918 | 0.136942 | DaraVMP   | VMP       | ALCYONE      |
| -0.67856 | 0.13421  | MPT/MPT-T | MP        | IFM-99/06    |
| -0.11964 | 0.313441 | MPT/MPT-T | CTD       | Hungria2016  |
| 0.108844 | 0.144491 | VD        | VMP       | UPFRONT      |
| -0.2169  | 0.12426  | MPR-R     | Rd        | EMN01        |
| -0.70552 | 0.168967 | MPR-R     | MPR       | MM-015       |
| 0.328408 | 0.084639 | MPT/MPT-T | Rd        | FIRST        |
| -0.28476 | 0.098832 | MP        | D         | Facon2006    |
| -0.14518 | 0.122699 | M100      | MP        | IFM-99/06    |
| 0.101185 | 0.375549 | TD        | CTD       | Hungria2016  |
| -0.11245 | 0.154629 | VTD       | VMP       | UPFRONT      |
| 0.004314 | 0.0588   | CPR       | Rd        | EMN01        |
| 0.173842 | 0.11798  | MP        | MPR       | MM-015       |
| 0.354638 | 0.079689 | Rd18      | Rd        | FIRST        |

|          |          |           |      |             |
|----------|----------|-----------|------|-------------|
| -0.41903 | 0.107257 | MD        | D    | Facon2006   |
| -0.53472 | 0.146053 | MPT/MPT-T | M100 | IFM-99/06   |
| -0.31326 | 0.395568 | MPT/MPT-T | TD   | Hungria2016 |
| 0.11289  | 0.152666 | VD        | VTD  | UPFRONT     |
| -0.22676 | 0.123291 | MPR-R     | CPR  | EMN01       |
| -0.91864 | 0.156192 | MPR-R     | MP   | MM-015      |
| -0.03289 | 0.07624  | MPT/MPT-T | Rd18 | FIRST       |
| 0.139955 | 0.106084 | MP        | MD   | Facon2006   |
| -0.08317 | 0.094656 | DI        | D    | Facon2006   |
| 0.231945 | 0.099595 | DI        | MP   | Facon2006   |
| 0.370823 | 0.10788  | DI        | MD   | Facon2006   |

##### #2: data for scenario analysis #1 with thalidomide maintenance split [[file name: TNEMM\_NMA\_data-ThalMaintSA.csv]]

| TE       | seTE     | treat1  | treat2 | studlab      |
|----------|----------|---------|--------|--------------|
| -0.70694 | 0.132986 | TD      | D      | Rajkumar2008 |
| 0.26266  | 0.160183 | TD      | MP     | Ludwig2009   |
| -0.47235 | 0.133484 | MPT-T   | MP     | Palumbo2008  |
| -0.48749 | 0.147472 | MPT     | MP     | IFM-01/01    |
| -0.11723 | 0.122169 | MPT-T   | MP     | NMSG         |
| -0.35525 | 0.261358 | MPT-T   | MP     | TMSG         |
| -0.23902 | 0.12195  | MPT-T   | MP     | HOVON49      |
| -0.40103 | 0.289061 | MPT     | MP     | Sacchi2011   |
| -0.22754 | 0.136104 | VMP     | VTP    | GEM2005      |
| -0.21647 | 0.078876 | CTD(a)  | MP     | MRC-MIX      |
| -0.58344 | 0.176245 | VMP     | MP     | VISTA        |
| -0.54876 | 0.10524  | VMPT-VT | VMP    | GIMEMA0305   |
| -0.58867 | 0.180076 | Rd      | D      | S0232        |
| -0.14464 | 0.093809 | MPR-R   | MPT-T  | HOVON87      |
| -0.33927 | 0.117128 | VRd     | Rd     | S0777        |
| -0.18005 | 0.135835 | MPT-T   | MPR-R  | E1A06        |
| -0.69918 | 0.136942 | DaraVMP | VMP    | ALCYONE      |
| -0.67856 | 0.13421  | MPT     | MP     | IFM-99/06    |
| -0.11964 | 0.313441 | MPT     | CTD    | Hungria2016  |
| 0.108844 | 0.144491 | VD      | VMP    | UPFRONT      |
| -0.2169  | 0.12426  | MPR-R   | Rd     | EMN01        |
| -0.70552 | 0.168967 | MPR-R   | MPR    | MM-015       |
| 0.328408 | 0.084639 | MPT     | Rd     | FIRST        |
| -0.28476 | 0.098832 | MP      | D      | Facon2006    |
| -0.14518 | 0.122699 | M100    | MP     | IFM-99/06    |
| 0.101185 | 0.375549 | TD      | CTD    | Hungria2016  |
| -0.11245 | 0.154629 | VTD     | VMP    | UPFRONT      |
| 0.004314 | 0.0588   | CPR     | Rd     | EMN01        |
| 0.173842 | 0.11798  | MP      | MPR    | MM-015       |

|          |          |       |      |             |
|----------|----------|-------|------|-------------|
| 0.354638 | 0.079689 | Rd18  | Rd   | FIRST       |
| -0.41903 | 0.107257 | MD    | D    | Facon2006   |
| -0.53472 | 0.146053 | MPT   | M100 | IFM-99/06   |
| -0.31326 | 0.395568 | MPT   | TD   | Hungria2016 |
| 0.11289  | 0.152666 | VD    | VTD  | UPFRONT     |
| -0.22676 | 0.123291 | MPR-R | CPR  | EMN01       |
| -0.91864 | 0.156192 | MPR-R | MP   | MM-015      |
| -0.03289 | 0.07624  | MPT   | Rd18 | FIRST       |
| 0.139955 | 0.106084 | MP    | MD   | Facon2006   |
| -0.08317 | 0.094656 | DI    | D    | Facon2006   |
| 0.231945 | 0.099595 | DI    | MP   | Facon2006   |
| 0.370823 | 0.10788  | DI    | MD   | Facon2006   |

##### #3: data for scenario analysis #2 Replicating Weisel's NMA [[file name: TNEMM\_NMA\_data-Weisel.csv]]

| TE       | seTE     | treat1 | treat2 | studlab    |
|----------|----------|--------|--------|------------|
| -0.48749 | 0.147472 | MPT    | MP     | IFM-01/01  |
| -0.40103 | 0.289061 | MPT    | MP     | Sacchi2011 |
| -0.58344 | 0.176245 | VMP    | MP     | VISTA      |
| -0.67856 | 0.13421  | MPT    | MP     | IFM-99/06  |
| 0.328408 | 0.084639 | MPT    | Rd     | FIRST      |

##### #4: data for scenario analysis #3 Fixed effect model See #1 [[file name: TNEMM\_NMA\_data.csv]]

## Appendix 5 HR based on direct and indirect evidence

| Comparison  | Number of studies providing direct evidence | Direct evidence proportion | Estimated treatment effect (HR) in network meta-analysis | Estimated treatment effect (HR) derived from direct evidence | Estimated treatment effect (HR) derived from indirect evidence | Ratio of direct versus indirect | z-value of test for disagreement | p-value of test for disagreement |
|-------------|---------------------------------------------|----------------------------|----------------------------------------------------------|--------------------------------------------------------------|----------------------------------------------------------------|---------------------------------|----------------------------------|----------------------------------|
| CPR:CTD     | 0                                           | 0                          | 0.8332                                                   | .                                                            | 0.8332                                                         | .                               | .                                | .                                |
| CPR:CTD(a)  | 0                                           | 0                          | 0.8152                                                   | .                                                            | 0.8152                                                         | .                               | .                                | .                                |
| CPR:D       | 0                                           | 0                          | 0.4577                                                   | .                                                            | 0.4577                                                         | .                               | .                                | .                                |
| CPR:DaraVMP | 0                                           | 0                          | 2.3674                                                   | .                                                            | 2.3674                                                         | .                               | .                                | .                                |
| CPR:DI      | 0                                           | 0                          | 0.5067                                                   | .                                                            | 0.5067                                                         | .                               | .                                | .                                |
| CPR:M100    | 0                                           | 0                          | 0.6693                                                   | .                                                            | 0.6693                                                         | .                               | .                                | .                                |
| CPR:MD      | 0                                           | 0                          | 0.7282                                                   | .                                                            | 0.7282                                                         | .                               | .                                | .                                |
| CPR:MP      | 0                                           | 0                          | 0.6565                                                   | .                                                            | 0.6565                                                         | .                               | .                                | .                                |
| CPR:MPR     | 0                                           | 0                          | 0.6935                                                   | .                                                            | 0.6935                                                         | .                               | .                                | .                                |
| CPR:MPR-R   | 1                                           | 0.82                       | 1.1777                                                   | 1.2545                                                       | 0.8818                                                         | 1.4226                          | 0.58                             | 0.5629                           |
| CPR:MPT     | 0                                           | 0                          | 0.9823                                                   | .                                                            | 0.9823                                                         | .                               | .                                | .                                |
| CPR:Rd      | 1                                           | 0.89                       | 1.0498                                                   | 1.0043                                                       | 1.5196                                                         | 0.6609                          | -0.58                            | 0.5629                           |
| CPR:Rd18    | 0                                           | 0                          | 0.8376                                                   | .                                                            | 0.8376                                                         | .                               | .                                | .                                |
| CPR:TD      | 0                                           | 0                          | 0.7034                                                   | .                                                            | 0.7034                                                         | .                               | .                                | .                                |
| CPR:VD      | 0                                           | 0                          | 1.0922                                                   | .                                                            | 1.0922                                                         | .                               | .                                | .                                |
| CPR:VMP     | 0                                           | 0                          | 1.1766                                                   | .                                                            | 1.1766                                                         | .                               | .                                | .                                |
| CPR:VMPT-VT | 0                                           | 0                          | 2.0368                                                   | .                                                            | 2.0368                                                         | .                               | .                                | .                                |
| CPR:VRd     | 0                                           | 0                          | 1.4738                                                   | .                                                            | 1.4738                                                         | .                               | .                                | .                                |
| CPR:VTD     | 0                                           | 0                          | 1.2684                                                   | .                                                            | 1.2684                                                         | .                               | .                                | .                                |
| CPR:VTP     | 0                                           | 0                          | 0.9371                                                   | .                                                            | 0.9371                                                         | .                               | .                                | .                                |
| CTD(a):CTD  | 0                                           | 0                          | 1.0222                                                   | .                                                            | 1.0222                                                         | .                               | .                                | .                                |
| D:CTD       | 0                                           | 0                          | 1.8204                                                   | .                                                            | 1.8204                                                         | .                               | .                                | .                                |
| DaraVMP:CTD | 0                                           | 0                          | 0.352                                                    | .                                                            | 0.352                                                          | .                               | .                                | .                                |
| DI:CTD      | 0                                           | 0                          | 1.6445                                                   | .                                                            | 1.6445                                                         | .                               | .                                | .                                |
| M100:CTD    | 0                                           | 0                          | 1.245                                                    | .                                                            | 1.245                                                          | .                               | .                                | .                                |
| MD:CTD      | 0                                           | 0                          | 1.1442                                                   | .                                                            | 1.1442                                                         | .                               | .                                | .                                |
| MP:CTD      | 0                                           | 0                          | 1.2692                                                   | .                                                            | 1.2692                                                         | .                               | .                                | .                                |
| MPR:CTD     | 0                                           | 0                          | 1.2015                                                   | .                                                            | 1.2015                                                         | .                               | .                                | .                                |
| MPR-R:CTD   | 0                                           | 0                          | 0.7075                                                   | .                                                            | 0.7075                                                         | .                               | .                                | .                                |
| MPT:CTD     | 1                                           | 0.83                       | 0.8483                                                   | 0.8872                                                       | 0.686                                                          | 1.2933                          | 0.28                             | 0.781                            |
| Rd:CTD      | 0                                           | 0                          | 0.7937                                                   | .                                                            | 0.7937                                                         | .                               | .                                | .                                |
| Rd18:CTD    | 0                                           | 0                          | 0.9948                                                   | .                                                            | 0.9948                                                         | .                               | .                                | .                                |
| TD:CTD      | 1                                           | 0.69                       | 1.1846                                                   | 1.1065                                                       | 1.3757                                                         | 0.8043                          | -0.28                            | 0.781                            |



| Comparison     | Number of studies providing direct evidence | Direct evidence proportion | Estimated treatment effect (HR) in network meta-analysis | Estimated treatment effect (HR) derived from direct evidence | Estimated treatment effect (HR) derived from indirect evidence | Ratio of direct versus indirect | z-value of test for disagreement | p-value of test for disagreement |
|----------------|---------------------------------------------|----------------------------|----------------------------------------------------------|--------------------------------------------------------------|----------------------------------------------------------------|---------------------------------|----------------------------------|----------------------------------|
| VD:CTD         | 0                                           | 0                          | 0.7629                                                   | .                                                            | 0.7629                                                         | .                               | .                                | .                                |
| VMP:CTD        | 0                                           | 0                          | 0.7082                                                   | .                                                            | 0.7082                                                         | .                               | .                                | .                                |
| VMPT-VT:CTD    | 0                                           | 0                          | 0.4091                                                   | .                                                            | 0.4091                                                         | .                               | .                                | .                                |
| VRd:CTD        | 0                                           | 0                          | 0.5654                                                   | .                                                            | 0.5654                                                         | .                               | .                                | .                                |
| VTD:CTD        | 0                                           | 0                          | 0.6569                                                   | .                                                            | 0.6569                                                         | .                               | .                                | .                                |
| VTP:CTD        | 0                                           | 0                          | 0.8891                                                   | .                                                            | 0.8891                                                         | .                               | .                                | .                                |
| D:CTD(a)       | 0                                           | 0                          | 1.7809                                                   | .                                                            | 1.7809                                                         | .                               | .                                | .                                |
| DaraVMP:CTD(a) | 0                                           | 0                          | 0.3443                                                   | .                                                            | 0.3443                                                         | .                               | .                                | .                                |
| DI:CTD(a)      | 0                                           | 0                          | 1.6088                                                   | .                                                            | 1.6088                                                         | .                               | .                                | .                                |
| M100:CTD(a)    | 0                                           | 0                          | 1.218                                                    | .                                                            | 1.218                                                          | .                               | .                                | .                                |
| MD:CTD(a)      | 0                                           | 0                          | 1.1194                                                   | .                                                            | 1.1194                                                         | .                               | .                                | .                                |
| MP:CTD(a)      | 1                                           | 1                          | 1.2417                                                   | 1.2417                                                       | .                                                              | .                               | .                                | .                                |
| MPR:CTD(a)     | 0                                           | 0                          | 1.1754                                                   | .                                                            | 1.1754                                                         | .                               | .                                | .                                |
| MPR-R:CTD(a)   | 0                                           | 0                          | 0.6922                                                   | .                                                            | 0.6922                                                         | .                               | .                                | .                                |
| MPT:CTD(a)     | 0                                           | 0                          | 0.8298                                                   | .                                                            | 0.8298                                                         | .                               | .                                | .                                |
| Rd:CTD(a)      | 0                                           | 0                          | 0.7765                                                   | .                                                            | 0.7765                                                         | .                               | .                                | .                                |
| Rd18:CTD(a)    | 0                                           | 0                          | 0.9732                                                   | .                                                            | 0.9732                                                         | .                               | .                                | .                                |
| TD:CTD(a)      | 0                                           | 0                          | 1.1589                                                   | .                                                            | 1.1589                                                         | .                               | .                                | .                                |
| VD:CTD(a)      | 0                                           | 0                          | 0.7464                                                   | .                                                            | 0.7464                                                         | .                               | .                                | .                                |
| VMP:CTD(a)     | 0                                           | 0                          | 0.6928                                                   | .                                                            | 0.6928                                                         | .                               | .                                | .                                |
| VMPT-VT:CTD(a) | 0                                           | 0                          | 0.4002                                                   | .                                                            | 0.4002                                                         | .                               | .                                | .                                |
| VRd:CTD(a)     | 0                                           | 0                          | 0.5531                                                   | .                                                            | 0.5531                                                         | .                               | .                                | .                                |
| VTD:CTD(a)     | 0                                           | 0                          | 0.6427                                                   | .                                                            | 0.6427                                                         | .                               | .                                | .                                |
| VTP:CTD(a)     | 0                                           | 0                          | 0.8699                                                   | .                                                            | 0.8699                                                         | .                               | .                                | .                                |
| DaraVMP:D      | 0                                           | 0                          | 0.1933                                                   | .                                                            | 0.1933                                                         | .                               | .                                | .                                |
| DI:D           | 1                                           | 0.88                       | 0.9034                                                   | 0.9202                                                       | 0.7885                                                         | 1.167                           | 0.22                             | 0.8278                           |
| M100:D         | 0                                           | 0                          | 0.6839                                                   | .                                                            | 0.6839                                                         | .                               | .                                | .                                |
| MD:D           | 1                                           | 0.88                       | 0.6285                                                   | 0.6577                                                       | 0.4499                                                         | 1.4618                          | 0.52                             | 0.6007                           |
| MP:D           | 1                                           | 0.51                       | 0.6972                                                   | 0.7522                                                       | 0.6437                                                         | 1.1686                          | 0.44                             | 0.66                             |
| MPR:D          | 0                                           | 0                          | 0.66                                                     | .                                                            | 0.66                                                           | .                               | .                                | .                                |
| MPR-R:D        | 0                                           | 0                          | 0.3887                                                   | .                                                            | 0.3887                                                         | .                               | .                                | .                                |
| MPT:D          | 0                                           | 0                          | 0.466                                                    | .                                                            | 0.466                                                          | .                               | .                                | .                                |
| Rd:D           | 1                                           | 0.5                        | 0.436                                                    | 0.5551                                                       | 0.3437                                                         | 1.6151                          | 1.18                             | 0.2398                           |

| Comparison      | Number of studies providing direct evidence | Direct evidence proportion | Estimated treatment effect (HR) in network meta-analysis | Estimated treatment effect (HR) derived from direct evidence | Estimated treatment effect (HR) derived from indirect evidence | Ratio of direct versus indirect | z-value of test for disagreement | p-value of test for disagreement |
|-----------------|---------------------------------------------|----------------------------|----------------------------------------------------------|--------------------------------------------------------------|----------------------------------------------------------------|---------------------------------|----------------------------------|----------------------------------|
| Rd18:D          | 0                                           | 0                          | 0.5465                                                   | .                                                            | 0.5465                                                         | .                               | .                                | .                                |
| TD:D            | 1                                           | 0.58                       | 0.6508                                                   | 0.4932                                                       | 0.9593                                                         | 0.5141                          | -1.64                            | 0.102                            |
| VD:D            | 0                                           | 0                          | 0.4191                                                   | .                                                            | 0.4191                                                         | .                               | .                                | .                                |
| VMP:D           | 0                                           | 0                          | 0.389                                                    | .                                                            | 0.389                                                          | .                               | .                                | .                                |
| VMPT-VT:D       | 0                                           | 0                          | 0.2247                                                   | .                                                            | 0.2247                                                         | .                               | .                                | .                                |
| VRd:D           | 0                                           | 0                          | 0.3106                                                   | .                                                            | 0.3106                                                         | .                               | .                                | .                                |
| VTD:D           | 0                                           | 0                          | 0.3609                                                   | .                                                            | 0.3609                                                         | .                               | .                                | .                                |
| VTP:D           | 0                                           | 0                          | 0.4884                                                   | .                                                            | 0.4884                                                         | .                               | .                                | .                                |
| DI:DaraVMP      | 0                                           | 0                          | 4.6722                                                   | .                                                            | 4.6722                                                         | .                               | .                                | .                                |
| M100:DaraVMP    | 0                                           | 0                          | 3.5373                                                   | .                                                            | 3.5373                                                         | .                               | .                                | .                                |
| MD:DaraVMP      | 0                                           | 0                          | 3.2508                                                   | .                                                            | 3.2508                                                         | .                               | .                                | .                                |
| MP:DaraVMP      | 0                                           | 0                          | 3.6061                                                   | .                                                            | 3.6061                                                         | .                               | .                                | .                                |
| MPR:DaraVMP     | 0                                           | 0                          | 3.4136                                                   | .                                                            | 3.4136                                                         | .                               | .                                | .                                |
| MPR-R:DaraVMP   | 0                                           | 0                          | 2.0101                                                   | .                                                            | 2.0101                                                         | .                               | .                                | .                                |
| MPT:DaraVMP     | 0                                           | 0                          | 2.41                                                     | .                                                            | 2.41                                                           | .                               | .                                | .                                |
| Rd:DaraVMP      | 0                                           | 0                          | 2.2551                                                   | .                                                            | 2.2551                                                         | .                               | .                                | .                                |
| Rd18:DaraVMP    | 0                                           | 0                          | 2.8264                                                   | .                                                            | 2.8264                                                         | .                               | .                                | .                                |
| TD:DaraVMP      | 0                                           | 0                          | 3.3658                                                   | .                                                            | 3.3658                                                         | .                               | .                                | .                                |
| VD:DaraVMP      | 0                                           | 0                          | 2.1676                                                   | .                                                            | 2.1676                                                         | .                               | .                                | .                                |
| VMP:DaraVMP     | 1                                           | 1                          | 2.0121                                                   | 2.0121                                                       | .                                                              | .                               | .                                | .                                |
| VMPT-VT:DaraVMP | 0                                           | 0                          | 1.1623                                                   | .                                                            | 1.1623                                                         | .                               | .                                | .                                |
| VRd:DaraVMP     | 0                                           | 0                          | 1.6063                                                   | .                                                            | 1.6063                                                         | .                               | .                                | .                                |
| VTD:DaraVMP     | 0                                           | 0                          | 1.8665                                                   | .                                                            | 1.8665                                                         | .                               | .                                | .                                |
| VTP:DaraVMP     | 0                                           | 0                          | 2.5262                                                   | .                                                            | 2.5262                                                         | .                               | .                                | .                                |
| M100:DI         | 0                                           | 0                          | 0.7571                                                   | .                                                            | 0.7571                                                         | .                               | .                                | .                                |
| MD:DI           | 1                                           | 1                          | 0.6958                                                   | 0.6902                                                       | .                                                              | .                               | .                                | .                                |
| MP:DI           | 1                                           | 0.87                       | 0.7718                                                   | 0.793                                                        | 0.6389                                                         | 1.2411                          | 0.31                             | 0.7573                           |
| MPR:DI          | 0                                           | 0                          | 0.7306                                                   | .                                                            | 0.7306                                                         | .                               | .                                | .                                |
| MPR-R:DI        | 0                                           | 0                          | 0.4302                                                   | .                                                            | 0.4302                                                         | .                               | .                                | .                                |
| MPT:DI          | 0                                           | 0                          | 0.5158                                                   | .                                                            | 0.5158                                                         | .                               | .                                | .                                |
| Rd:DI           | 0                                           | 0                          | 0.4827                                                   | .                                                            | 0.4827                                                         | .                               | .                                | .                                |
| Rd18:DI         | 0                                           | 0                          | 0.6049                                                   | .                                                            | 0.6049                                                         | .                               | .                                | .                                |
| TD:DI           | 0                                           | 0                          | 0.7204                                                   | .                                                            | 0.7204                                                         | .                               | .                                | .                                |
| VD:DI           | 0                                           | 0                          | 0.4639                                                   | .                                                            | 0.4639                                                         | .                               | .                                | .                                |
| VMP:DI          | 0                                           | 0                          | 0.4307                                                   | .                                                            | 0.4307                                                         | .                               | .                                | .                                |
| VMPT-VT:DI      | 0                                           | 0                          | 0.2488                                                   | .                                                            | 0.2488                                                         | .                               | .                                | .                                |

| Comparison   | Number of studies providing direct evidence | Direct evidence proportion | Estimated treatment effect (HR) in network meta-analysis | Estimated treatment effect (HR) derived from direct evidence | Estimated treatment effect (HR) derived from indirect evidence | Ratio of direct versus indirect | z-value of test for disagreement | p-value of test for disagreement |
|--------------|---------------------------------------------|----------------------------|----------------------------------------------------------|--------------------------------------------------------------|----------------------------------------------------------------|---------------------------------|----------------------------------|----------------------------------|
| VRd:DI       | 0                                           | 0                          | 0.3438                                                   | .                                                            | 0.3438                                                         | .                               | .                                | .                                |
| VTD:DI       | 0                                           | 0                          | 0.3995                                                   | .                                                            | 0.3995                                                         | .                               | .                                | .                                |
| VTP:DI       | 0                                           | 0                          | 0.5407                                                   | .                                                            | 0.5407                                                         | .                               | .                                | .                                |
| M100:MD      | 0                                           | 0                          | 1.0881                                                   | .                                                            | 1.0881                                                         | .                               | .                                | .                                |
| M100:MP      | 1                                           | 0.81                       | 0.9809                                                   | 0.8649                                                       | 1.6979                                                         | 0.5094                          | -1.13                            | 0.258                            |
| M100:MPR     | 0                                           | 0                          | 1.0362                                                   | .                                                            | 1.0362                                                         | .                               | .                                | .                                |
| M100:MPR-R   | 0                                           | 0                          | 1.7597                                                   | .                                                            | 1.7597                                                         | .                               | .                                | .                                |
| M100:MPT     | 1                                           | 0.75                       | 1.4678                                                   | 1.707                                                        | 0.9222                                                         | 1.8511                          | 1.13                             | 0.258                            |
| M100:Rd      | 0                                           | 0                          | 1.5686                                                   | .                                                            | 1.5686                                                         | .                               | .                                | .                                |
| M100:Rd18    | 0                                           | 0                          | 1.2515                                                   | .                                                            | 1.2515                                                         | .                               | .                                | .                                |
| M100:TD      | 0                                           | 0                          | 1.051                                                    | .                                                            | 1.051                                                          | .                               | .                                | .                                |
| M100:VD      | 0                                           | 0                          | 1.6319                                                   | .                                                            | 1.6319                                                         | .                               | .                                | .                                |
| M100:VMP     | 0                                           | 0                          | 1.758                                                    | .                                                            | 1.758                                                          | .                               | .                                | .                                |
| M100:VMPT-VT | 0                                           | 0                          | 3.0433                                                   | .                                                            | 3.0433                                                         | .                               | .                                | .                                |
| M100:VRd     | 0                                           | 0                          | 2.2022                                                   | .                                                            | 2.2022                                                         | .                               | .                                | .                                |
| M100:VTD     | 0                                           | 0                          | 1.8952                                                   | .                                                            | 1.8952                                                         | .                               | .                                | .                                |
| M100:VTP     | 0                                           | 0                          | 1.4002                                                   | .                                                            | 1.4002                                                         | .                               | .                                | .                                |
| MP:MD        | 1                                           | 0.88                       | 1.1093                                                   | 1.1502                                                       | 0.8458                                                         | 1.3599                          | 0.42                             | 0.6731                           |
| MPR:MD       | 0                                           | 0                          | 1.0501                                                   | .                                                            | 1.0501                                                         | .                               | .                                | .                                |
| MPR-R:MD     | 0                                           | 0                          | 0.6183                                                   | .                                                            | 0.6183                                                         | .                               | .                                | .                                |
| MPT:MD       | 0                                           | 0                          | 0.7414                                                   | .                                                            | 0.7414                                                         | .                               | .                                | .                                |
| Rd:MD        | 0                                           | 0                          | 0.6937                                                   | .                                                            | 0.6937                                                         | .                               | .                                | .                                |
| Rd18:MD      | 0                                           | 0                          | 0.8694                                                   | .                                                            | 0.8694                                                         | .                               | .                                | .                                |
| TD:MD        | 0                                           | 0                          | 1.0353                                                   | .                                                            | 1.0353                                                         | .                               | .                                | .                                |
| VD:MD        | 0                                           | 0                          | 0.6668                                                   | .                                                            | 0.6668                                                         | .                               | .                                | .                                |
| VMP:MD       | 0                                           | 0                          | 0.619                                                    | .                                                            | 0.619                                                          | .                               | .                                | .                                |
| VMPT-VT:MD   | 0                                           | 0                          | 0.3575                                                   | .                                                            | 0.3575                                                         | .                               | .                                | .                                |
| VRd:MD       | 0                                           | 0                          | 0.4941                                                   | .                                                            | 0.4941                                                         | .                               | .                                | .                                |
| VTD:MD       | 0                                           | 0                          | 0.5741                                                   | .                                                            | 0.5741                                                         | .                               | .                                | .                                |
| VTP:MD       | 0                                           | 0                          | 0.7771                                                   | .                                                            | 0.7771                                                         | .                               | .                                | .                                |
| MP:MPR       | 1                                           | 0.87                       | 1.0564                                                   | 1.1899                                                       | 0.4788                                                         | 2.4852                          | 1.29                             | 0.1976                           |
| MP:MPR-R     | 1                                           | 0.31                       | 1.7939                                                   | 2.5059                                                       | 1.546                                                          | 1.6208                          | 1.46                             | 0.1443                           |
| MP:MPT       | 7                                           | 0.83                       | 1.4963                                                   | 1.4783                                                       | 1.5895                                                         | 0.93                            | -0.28                            | 0.7806                           |
| MP:Rd        | 0                                           | 0                          | 1.5991                                                   | .                                                            | 1.5991                                                         | .                               | .                                | .                                |
| MP:Rd18      | 0                                           | 0                          | 1.2759                                                   | .                                                            | 1.2759                                                         | .                               | .                                | .                                |
| MP:TD        | 1                                           | 0.49                       | 1.0714                                                   | 0.769                                                        | 1.4766                                                         | 0.5208                          | -1.68                            | 0.0937                           |
| MP:VD        | 0                                           | 0                          | 1.6636                                                   | .                                                            | 1.6636                                                         | .                               | .                                | .                                |
| MP:VMP       | 1                                           | 1                          | 1.7922                                                   | 1.7922                                                       | .                                                              | .                               | .                                | .                                |

| Comparison    | Number of studies providing direct evidence | Direct evidence proportion | Estimated treatment effect (HR) in network meta-analysis | Estimated treatment effect (HR) derived from direct evidence | Estimated treatment effect (HR) derived from indirect evidence | Ratio of direct versus indirect | z-value of test for disagreement | p-value of test for disagreement |
|---------------|---------------------------------------------|----------------------------|----------------------------------------------------------|--------------------------------------------------------------|----------------------------------------------------------------|---------------------------------|----------------------------------|----------------------------------|
| MP:VMPT-VT    | 0                                           | 0                          | 3.1025                                                   | .                                                            | 3.1025                                                         | .                               | .                                | .                                |
| MP:VRd        | 0                                           | 0                          | 2.245                                                    | .                                                            | 2.245                                                          | .                               | .                                | .                                |
| MP:VTD        | 0                                           | 0                          | 1.932                                                    | .                                                            | 1.932                                                          | .                               | .                                | .                                |
| MP:VTP        | 0                                           | 0                          | 1.4275                                                   | .                                                            | 1.4275                                                         | .                               | .                                | .                                |
| MPR:MPR-R     | 1                                           | 0.77                       | 1.6982                                                   | 2.0249                                                       | 0.9531                                                         | 2.1245                          | 1.29                             | 0.1976                           |
| MPR:MPT       | 0                                           | 0                          | 1.4164                                                   | .                                                            | 1.4164                                                         | .                               | .                                | .                                |
| MPR:Rd        | 0                                           | 0                          | 1.5137                                                   | .                                                            | 1.5137                                                         | .                               | .                                | .                                |
| MPR:Rd18      | 0                                           | 0                          | 1.2077                                                   | .                                                            | 1.2077                                                         | .                               | .                                | .                                |
| MPR:TD        | 0                                           | 0                          | 1.0142                                                   | .                                                            | 1.0142                                                         | .                               | .                                | .                                |
| MPR:VD        | 0                                           | 0                          | 1.5748                                                   | .                                                            | 1.5748                                                         | .                               | .                                | .                                |
| MPR:VMP       | 0                                           | 0                          | 1.6965                                                   | .                                                            | 1.6965                                                         | .                               | .                                | .                                |
| MPR:VMPT-VT   | 0                                           | 0                          | 2.9368                                                   | .                                                            | 2.9368                                                         | .                               | .                                | .                                |
| MPR:VRd       | 0                                           | 0                          | 2.1251                                                   | .                                                            | 2.1251                                                         | .                               | .                                | .                                |
| MPR:VTD       | 0                                           | 0                          | 1.8289                                                   | .                                                            | 1.8289                                                         | .                               | .                                | .                                |
| MPR:VTP       | 0                                           | 0                          | 1.3513                                                   | .                                                            | 1.3513                                                         | .                               | .                                | .                                |
| MPR-R:MPT     | 2                                           | 0.6                        | 0.8341                                                   | 1.0057                                                       | 0.627                                                          | 1.6039                          | 1.65                             | 0.0981                           |
| MPR-R:Rd      | 1                                           | 0.48                       | 0.8914                                                   | 0.805                                                        | 0.9806                                                         | 0.821                           | -0.55                            | 0.5832                           |
| MPR-R:Rd18    | 0                                           | 0                          | 0.7112                                                   | .                                                            | 0.7112                                                         | .                               | .                                | .                                |
| MPR-R:TD      | 0                                           | 0                          | 0.5972                                                   | .                                                            | 0.5972                                                         | .                               | .                                | .                                |
| MPR-R:VD      | 0                                           | 0                          | 0.9273                                                   | .                                                            | 0.9273                                                         | .                               | .                                | .                                |
| MPR-R:VMP     | 0                                           | 0                          | 0.999                                                    | .                                                            | 0.999                                                          | .                               | .                                | .                                |
| MPR-R:VMPT-VT | 0                                           | 0                          | 1.7294                                                   | .                                                            | 1.7294                                                         | .                               | .                                | .                                |
| MPR-R:VRd     | 0                                           | 0                          | 1.2514                                                   | .                                                            | 1.2514                                                         | .                               | .                                | .                                |
| MPR-R:VTD     | 0                                           | 0                          | 1.077                                                    | .                                                            | 1.077                                                          | .                               | .                                | .                                |
| MPR-R:VTP     | 0                                           | 0                          | 0.7957                                                   | .                                                            | 0.7957                                                         | .                               | .                                | .                                |
| MPT:Rd        | 1                                           | 0.48                       | 1.0687                                                   | 1.3888                                                       | 0.8351                                                         | 1.6629                          | 1.51                             | 0.1313                           |
| MPT:Rd18      | 1                                           | 0.87                       | 0.8527                                                   | 0.9676                                                       | 0.3641                                                         | 2.6575                          | 1.47                             | 0.1414                           |
| MPT:TD        | 1                                           | 0.2                        | 0.716                                                    | 0.7311                                                       | 0.7123                                                         | 1.0264                          | 0.05                             | 0.9594                           |
| MPT:VD        | 0                                           | 0                          | 1.1118                                                   | .                                                            | 1.1118                                                         | .                               | .                                | .                                |
| MPT:VMP       | 0                                           | 0                          | 1.1978                                                   | .                                                            | 1.1978                                                         | .                               | .                                | .                                |
| MPT:VMPT-VT   | 0                                           | 0                          | 2.0734                                                   | .                                                            | 2.0734                                                         | .                               | .                                | .                                |
| MPT:VRd       | 0                                           | 0                          | 1.5004                                                   | .                                                            | 1.5004                                                         | .                               | .                                | .                                |
| MPT:VTD       | 0                                           | 0                          | 1.2912                                                   | .                                                            | 1.2912                                                         | .                               | .                                | .                                |
| MPT:VTP       | 0                                           | 0                          | 0.954                                                    | .                                                            | 0.954                                                          | .                               | .                                | .                                |

| Comparison   | Number of studies providing direct evidence | Direct evidence proportion | Estimated treatment effect (HR) in network meta-analysis | Estimated treatment effect (HR) derived from direct evidence | Estimated treatment effect (HR) derived from indirect evidence | Ratio of direct versus indirect | z-value of test for disagreement | p-value of test for disagreement |
|--------------|---------------------------------------------|----------------------------|----------------------------------------------------------|--------------------------------------------------------------|----------------------------------------------------------------|---------------------------------|----------------------------------|----------------------------------|
| Rd:Rd18      | 1                                           | 0.87                       | 0.7979                                                   | 0.7014                                                       | 1.8477                                                         | 0.3796                          | -1.47                            | 0.1414                           |
| Rd:TD        | 0                                           | 0                          | 0.67                                                     | .                                                            | 0.67                                                           | .                               | .                                | .                                |
| Rd:VD        | 0                                           | 0                          | 1.0404                                                   | .                                                            | 1.0404                                                         | .                               | .                                | .                                |
| Rd:VMP       | 0                                           | 0                          | 1.1208                                                   | .                                                            | 1.1208                                                         | .                               | .                                | .                                |
| Rd:VMPT-VT   | 0                                           | 0                          | 1.9401                                                   | .                                                            | 1.9401                                                         | .                               | .                                | .                                |
| Rd:VRd       | 1                                           | 1                          | 1.4039                                                   | 1.4039                                                       | .                                                              | .                               | .                                | .                                |
| Rd:VTD       | 0                                           | 0                          | 1.2082                                                   | .                                                            | 1.2082                                                         | .                               | .                                | .                                |
| Rd:VTP       | 0                                           | 0                          | 0.8927                                                   | .                                                            | 0.8927                                                         | .                               | .                                | .                                |
| Rd18:TD      | 0                                           | 0                          | 0.8398                                                   | .                                                            | 0.8398                                                         | .                               | .                                | .                                |
| Rd18:VD      | 0                                           | 0                          | 1.3039                                                   | .                                                            | 1.3039                                                         | .                               | .                                | .                                |
| Rd18:VMP     | 0                                           | 0                          | 1.4047                                                   | .                                                            | 1.4047                                                         | .                               | .                                | .                                |
| Rd18:VMPT-VT | 0                                           | 0                          | 2.4317                                                   | .                                                            | 2.4317                                                         | .                               | .                                | .                                |
| Rd18:VRd     | 0                                           | 0                          | 1.7596                                                   | .                                                            | 1.7596                                                         | .                               | .                                | .                                |
| Rd18:VTD     | 0                                           | 0                          | 1.5143                                                   | .                                                            | 1.5143                                                         | .                               | .                                | .                                |
| Rd18:VTP     | 0                                           | 0                          | 1.1188                                                   | .                                                            | 1.1188                                                         | .                               | .                                | .                                |
| VD:TD        | 0                                           | 0                          | 0.644                                                    | .                                                            | 0.644                                                          | .                               | .                                | .                                |
| VMP:TD       | 0                                           | 0                          | 0.5978                                                   | .                                                            | 0.5978                                                         | .                               | .                                | .                                |
| VMPT-VT:TD   | 0                                           | 0                          | 0.3453                                                   | .                                                            | 0.3453                                                         | .                               | .                                | .                                |
| VRd:TD       | 0                                           | 0                          | 0.4772                                                   | .                                                            | 0.4772                                                         | .                               | .                                | .                                |
| VTD:TD       | 0                                           | 0                          | 0.5545                                                   | .                                                            | 0.5545                                                         | .                               | .                                | .                                |
| VTP:TD       | 0                                           | 0                          | 0.7506                                                   | .                                                            | 0.7506                                                         | .                               | .                                | .                                |
| VMP:VD       | 1                                           | 1                          | 0.9283                                                   | 0.8969                                                       | .                                                              | .                               | .                                | .                                |
| VMPT-VT:VD   | 0                                           | 0                          | 0.5362                                                   | .                                                            | 0.5362                                                         | .                               | .                                | .                                |
| VRd:VD       | 0                                           | 0                          | 0.741                                                    | .                                                            | 0.741                                                          | .                               | .                                | .                                |
| VTD:VD       | 1                                           | 1                          | 0.8611                                                   | 0.8932                                                       | .                                                              | .                               | .                                | .                                |
| VTP:VD       | 0                                           | 0                          | 1.1654                                                   | .                                                            | 1.1654                                                         | .                               | .                                | .                                |
| VMP:VMPT-VT  | 1                                           | 1                          | 1.7311                                                   | 1.7311                                                       | .                                                              | .                               | .                                | .                                |
| VMP:VRd      | 0                                           | 0                          | 1.2526                                                   | .                                                            | 1.2526                                                         | .                               | .                                | .                                |
| VMP:VTD      | 1                                           | 1                          | 1.078                                                    | 1.119                                                        | .                                                              | .                               | .                                | .                                |
| VMP:VTP      | 1                                           | 1                          | 0.7965                                                   | 0.7965                                                       | .                                                              | .                               | .                                | .                                |
| VMPT-VT:VRd  | 0                                           | 0                          | 0.7236                                                   | .                                                            | 0.7236                                                         | .                               | .                                | .                                |
| VMPT-VT:VTD  | 0                                           | 0                          | 0.6227                                                   | .                                                            | 0.6227                                                         | .                               | .                                | .                                |
| VMPT-VT:VTP  | 0                                           | 0                          | 0.4601                                                   | .                                                            | 0.4601                                                         | .                               | .                                | .                                |
| VRd:VTD      | 0                                           | 0                          | 0.8606                                                   | .                                                            | 0.8606                                                         | .                               | .                                | .                                |
| VRd:VTP      | 0                                           | 0                          | 0.6358                                                   | .                                                            | 0.6358                                                         | .                               | .                                | .                                |
| VTP:VTD      | 0                                           | 0                          | 1.3535                                                   | .                                                            | 1.3535                                                         | .                               | .                                | .                                |

### Appendix 6 Figure Results comparison versus MPT

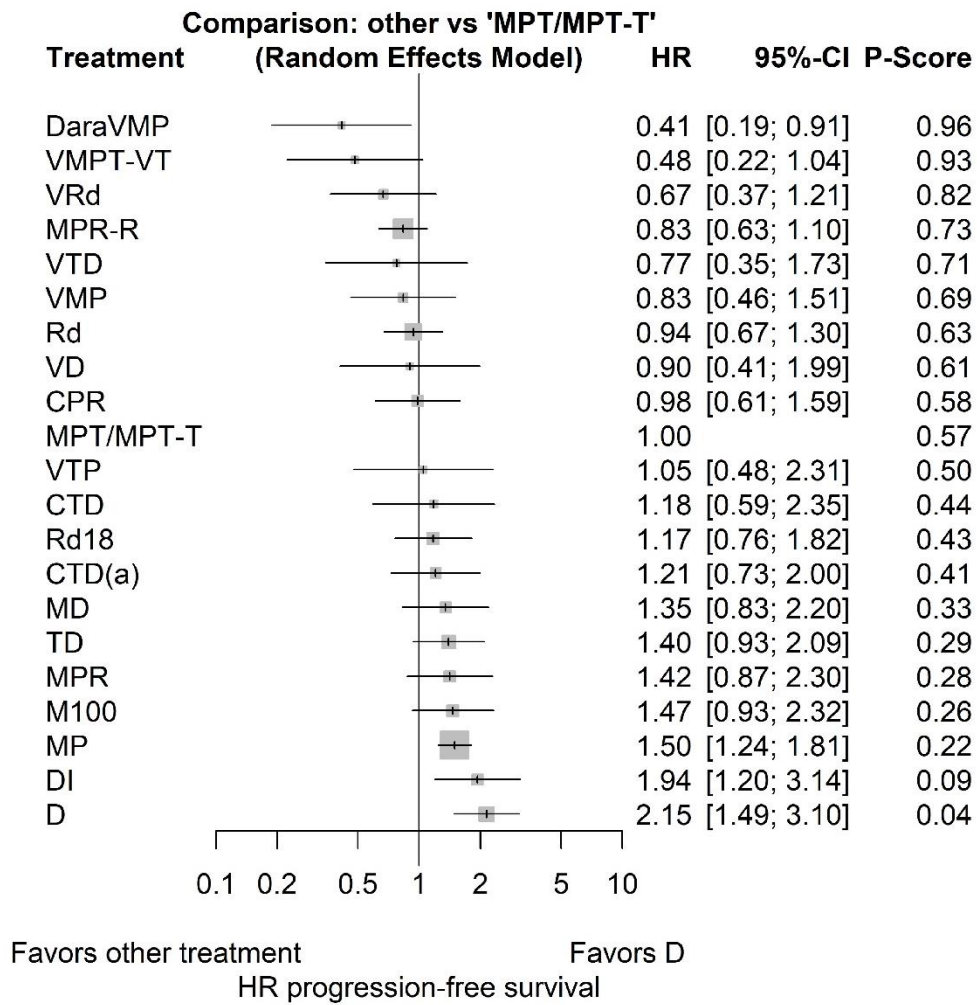

**Appendix 7 Figure Results scenario analysis separating MPT and MPT-T comparison versus D**

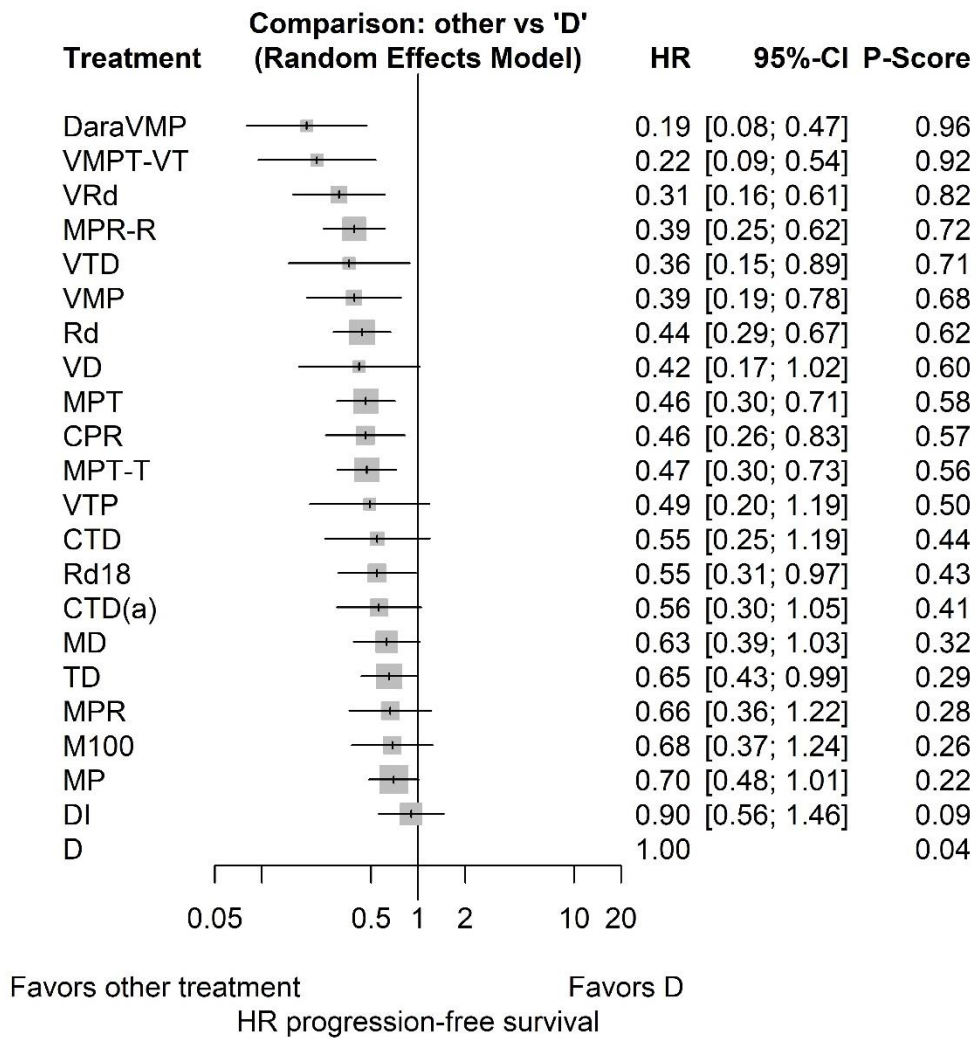

## Appendix 8 Results scenario analysis 2

Table Results scenario 2

|          | HR obtained by Weisel et al. |             | HR scenario analysis 2 |             |
|----------|------------------------------|-------------|------------------------|-------------|
|          | HR                           | 95% CrI     | HR                     | 95% CI      |
| Rd v MP  | 0.39                         | [0.31-0.50] | 0.41                   | [0.32-0.52] |
| Rd v MPT | 0.69                         | [0.59-0.80] | 0.72                   | [0.61-0.85] |
| Rd v VMP | 0.7                          | [0.49-0.99] | 0.73                   | [0.48-1.11] |

Figure Forestplot scenario 2

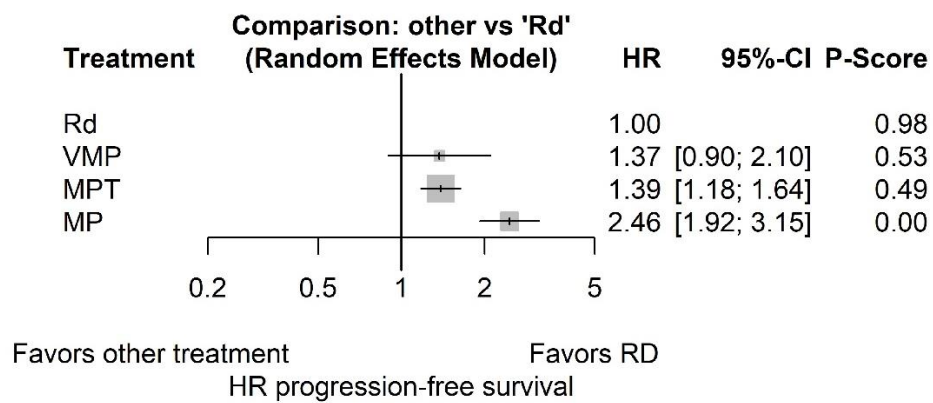



### Appendix 9 Figure Results scenario fixed effect model

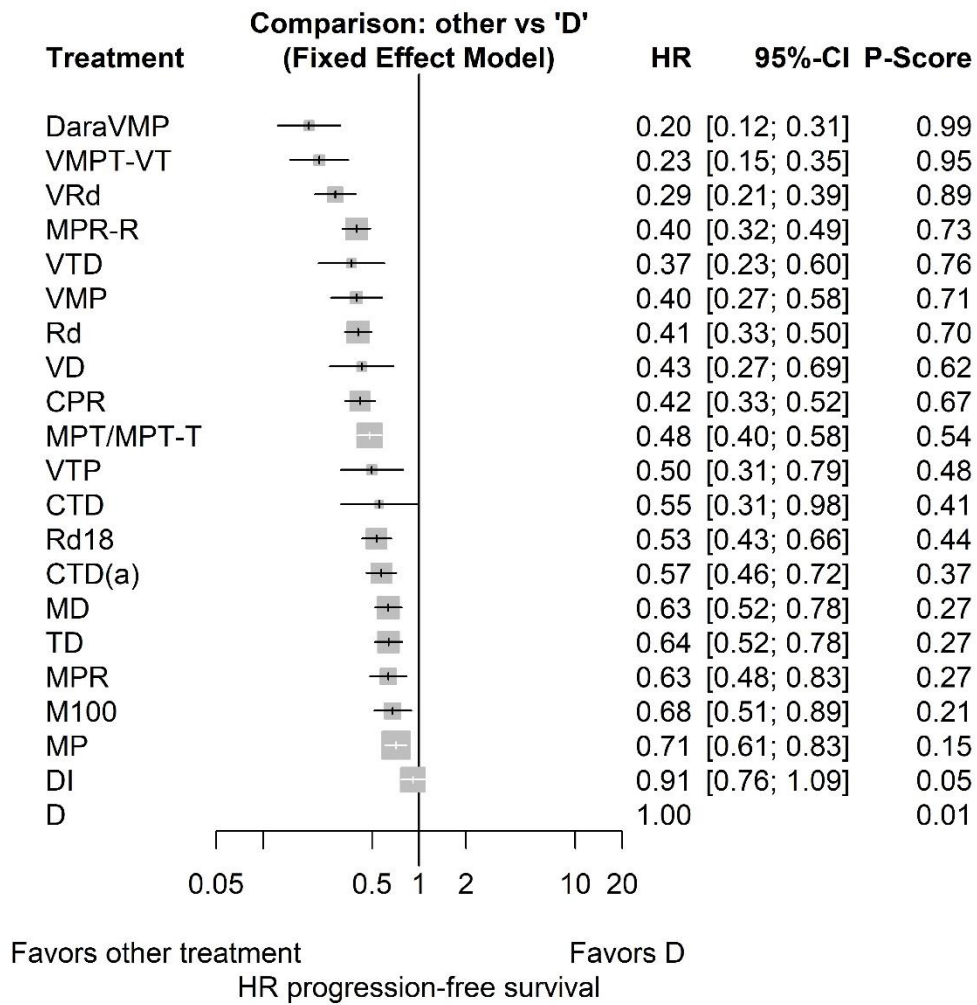

Supplement: 2018.206912.BLOMMESTEIN_SUPPL.pdf [file 2018.206912.BLOMMESTEIN_SUPPL.pdf]
